# Supplementary material for: Facile access to 2,5-diaryl fulleropyrrolidines: magnesium perchlorate-mediated reaction of [60]fullerene with arylmethylamines and aryl aldehydes
Source: Royal Society of Chemistry journal article supplement (doi:10.1039/c6ra16041g), 2016-01-01

## Electronic Supplementary Information

### A facile access to 2,5-diaryl fulleropyrrolidines: magnesium perchlorate-mediated reaction of [60]fullerene with arylmethamines and arylaldehydes

Hong-Yu Zhang,<sup>†a</sup> Hui-Juan Wang,<sup>†b</sup> Fa-Bao Li,<sup>\*a</sup> Chun-Xiang Liu,<sup>a</sup> Xiao-Feng

Zhang,<sup>a</sup> Li Liu<sup>\*a</sup> and Chao-Yang Liu<sup>\*b</sup>

*<sup>a</sup>Hubei Collaborative Innovation Center for Advanced Organic Chemical Materials,  
Ministry of Education Key Laboratory for the Synthesis and Application of Organic  
Functional Molecules, and School of Chemistry and Chemical Engineering, Hubei  
University, Wuhan 430062, P. R. China*

*E-mail: lfb0615@hubu.edu.cn; liulihubei@hubu.edu.cn*

*<sup>b</sup>State Key Laboratory of Magnetic Resonance and Atomic and Molecular Physics,  
Wuhan Center for Magnetic Resonance, Wuhan Institute of Physics and  
Mathematics, Chinese Academy of Sciences, Wuhan 430071, P. R. China*

*E-mail: chyliu@wipm.ac.cn*

*<sup>†</sup>Authors contributed equally.*

|                                                        |         |
|--------------------------------------------------------|---------|
| Optimization results (Table S1 )                       | S3-S4   |
| Typical MALDI-TOF MS of fulleropyrrolidines            | S5-S6   |
| <sup>1</sup> H NMR spectrum of compound <i>cis-3a</i>  | S7      |
| <sup>1</sup> H NMR spectrum of compound <i>cis-3b</i>  | S8      |
| <sup>13</sup> C NMR spectrum of compound <i>cis-3b</i> | S9-S10  |
| <sup>1</sup> H NMR spectrum of compound <i>cis-3c</i>  | S11     |
| <sup>13</sup> C NMR spectrum of compound <i>cis-3c</i> | S12-S13 |
| <sup>1</sup> H NMR spectrum of compound <i>cis-3d</i>  | S14     |
| <sup>13</sup> C NMR spectrum of compound <i>cis-3d</i> | S15-S16 |
| <sup>1</sup> H NMR spectrum of compound <i>cis-3e</i>  | S17     |
| <sup>1</sup> H NMR spectrum of compound <i>cis-3f</i>  | S18     |
| <sup>13</sup> C NMR spectrum of compound <i>cis-3f</i> | S19-S20 |
| <sup>1</sup> H NMR spectrum of compound <i>cis-3g</i>  | S21     |
| <sup>1</sup> H NMR spectrum of compound <i>cis-3h</i>  | S22     |
| <sup>1</sup> H NMR spectrum of compound <i>cis-3i</i>  | S23     |
| NOESY spectrum of compound <i>cis-3i</i>               | S24     |
| <sup>13</sup> C NMR spectrum of compound <i>cis-3i</i> | S25-S26 |
| <sup>1</sup> H NMR spectrum of compound <i>cis-3j</i>  | S27     |
| <sup>13</sup> C NMR spectrum of compound <i>cis-3j</i> | S28-S29 |
| <sup>1</sup> H NMR spectrum of compound <i>cis-3k</i>  | S30     |
| <sup>13</sup> C NMR spectrum of compound <i>cis-3k</i> | S31-S32 |
| <sup>1</sup> H NMR spectrum of compound <i>cis-3l</i>  | S33     |
| <sup>1</sup> H NMR spectrum of compound <i>cis-3m</i>  | S34     |
| NOESY spectrum of compound <i>cis-3m</i>               | S35     |
| <sup>13</sup> C NMR spectrum of compound <i>cis-3m</i> | S36-S37 |
| <sup>1</sup> H NMR spectrum of compound <i>cis-4a</i>  | S38     |
| <sup>1</sup> H NMR spectrum of compound <i>cis-4b</i>  | S39     |
| <sup>1</sup> H NMR spectrum of compound <i>cis-4c</i>  | S40     |
| <sup>13</sup> C NMR spectrum of compound <i>cis-4c</i> | S41-S42 |
| <sup>1</sup> H NMR spectrum of compound <i>cis-4d</i>  | S43     |
| <sup>13</sup> C NMR spectrum of compound <i>cis-4d</i> | S44-S45 |

**Reaction of C<sub>60</sub> with 2-chlorobenzaldehyde (2g) and 3-nitrobenzaldehyde (2i) in the presence of benzylamine (1a) and Mg(ClO<sub>4</sub>)<sub>2</sub> under different conditions**

To improve the product selectivity of the reaction of C<sub>60</sub> with 2-chlorobenzaldehyde (2g) and 3-nitrobenzaldehyde (2i) in the presence of benzylamine (1a) and Mg(ClO<sub>4</sub>)<sub>2</sub>, various reaction conditions have been screened. The reaction conditions and yields for the Mg(ClO<sub>4</sub>)<sub>2</sub>-mediated reactions of C<sub>60</sub> with 1a, 2g and 2i are summarized in Table S1. As can be seen from Table S1, increasing the amount of benzylamine (1a) from 5 to 10 equiv could selectively obtain the unsymmetrical 2,5-diaryl fulleropyrrolidine *cis*-3i in 38% isolated yield, while raising the amount of 2-chlorobenzaldehyde (2g) from 5 to 10 equiv had no benefit to the product selectivity of *cis*-3i and *cis*-4a. As for 3-nitrobenzaldehyde (2i), decreasing the reaction temperature from 160 to 120 °C together with varying the amount of benzylamine (1a) and 3-nitrobenzaldehyde (2i) (from 5 to 10 equiv) did not improve the product selectivity of *cis*-3k and *cis*-4c. Furthermore, increasing the amount of benzylamine (1a) from 5 to 10 equiv usually led to the formation of another 2,5-diaryl fulleropyrrolidine *cis*-3a, which would further reduce the selectivity of the reaction of C<sub>60</sub> with benzylamine (1a) and 3-nitrobenzaldehyde (2i) in the presence of Mg(ClO<sub>4</sub>)<sub>2</sub>.

**Table S1** Optimization of reaction conditions for the reaction of C<sub>60</sub> with benzylamine 1a and arylaldehydes 2g,i bearing electron-withdrawing groups under the assistance of Mg(ClO<sub>4</sub>)<sub>2</sub><sup>a</sup>

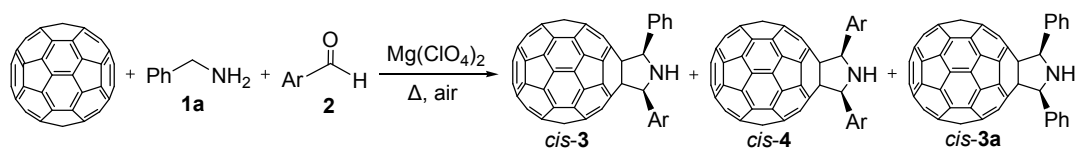

| Amine <b>1</b> | Aldehyde <b>2</b> | Molar ratio<br>(C <sub>60</sub> /Mg(ClO <sub>4</sub> ) <sub>2</sub> )/ <b>1a/2</b> ) | Time<br>(h)            | Product<br><i>cis</i> - <b>3</b> | Yield of<br><i>cis</i> - <b>3</b> <sup>b</sup><br>(%) | Product<br><i>cis</i> - <b>4</b> | Yield of<br><i>cis</i> - <b>4</b> <sup>b</sup><br>(%) | Yield of<br><i>cis</i> - <b>3a</b> <sup>b</sup><br>(%) |
|----------------|-------------------|--------------------------------------------------------------------------------------|------------------------|----------------------------------|-------------------------------------------------------|----------------------------------|-------------------------------------------------------|--------------------------------------------------------|
|                |                   | 1:2:5:5                                                                              | 22                     | <b>3i</b>                        | 29 (52)                                               | <b>4a</b>                        | 25 (45)                                               | trace                                                  |
|                |                   | <b>1:2:10:5</b>                                                                      | <b>24</b>              | <b>3i</b>                        | <b>38 (93)</b>                                        | <b>4a</b>                        | <b>trace</b>                                          | <b>trace</b>                                           |
|                |                   | 1:2:5:10                                                                             | 23                     | <b>3i</b>                        | 32 (57)                                               | <b>4a</b>                        | 22 (39)                                               | trace                                                  |
|                |                   | 1:2:10:5                                                                             | 26                     | <b>3k</b>                        | 23 (52)                                               | <b>4c</b>                        | 9 (20)                                                | 10 (23)                                                |
|                |                   | 1:2:5:10                                                                             | <b>24</b>              | <b>3k</b>                        | 18 (56)                                               | <b>4c</b>                        | 8 (25)                                                | trace                                                  |
|                |                   | 1:2:5:5                                                                              | <b>4<sup>c</sup></b>   | <b>3k</b>                        | 38 (57)                                               | <b>4c</b>                        | 26 (39)                                               | trace                                                  |
|                |                   | 1:2:10:5                                                                             | <b>4<sup>c</sup></b>   | <b>3k</b>                        | 36 (57)                                               | <b>4c</b>                        | 11 (17)                                               | 13 (21)                                                |
|                |                   | 1:2:5:10                                                                             | <b>3.5<sup>c</sup></b> | <b>3k</b>                        | 23 (44)                                               | <b>4c</b>                        | 24 (46)                                               | trace                                                  |

<sup>a</sup> All reactions were performed in chlorobenzene (10 mL) under air conditions at 120 °C unless otherwise indicated. <sup>b</sup> Isolated yield, those in parentheses were based on consumed C<sub>60</sub>. <sup>c</sup> The reaction was conducted at 160 °C in *o*-dichlorobenzene (6 mL).

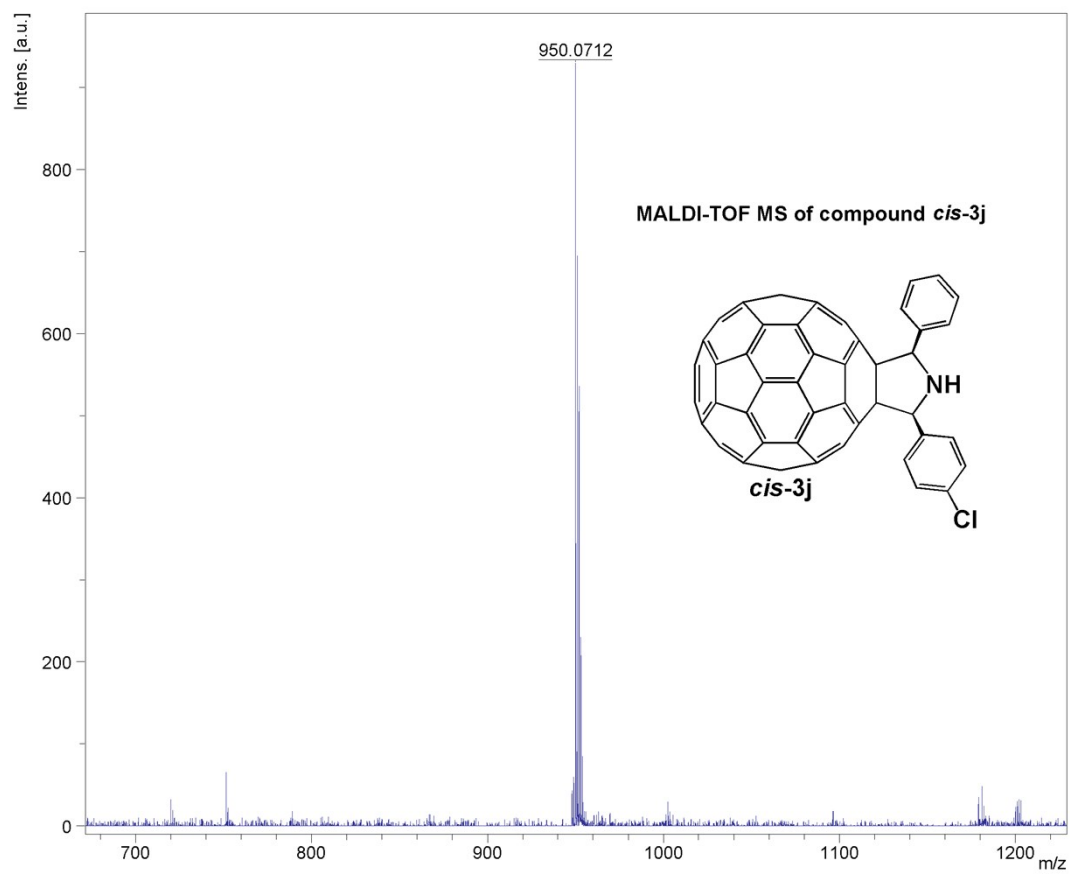

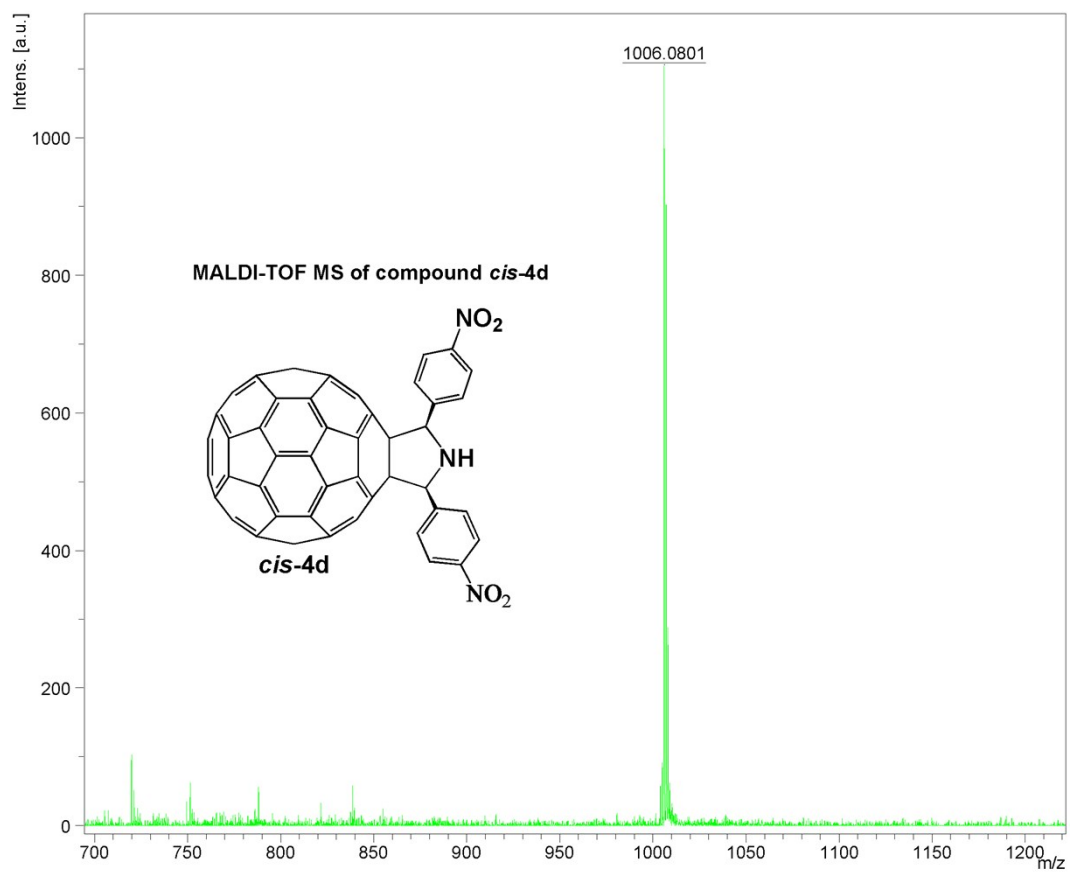

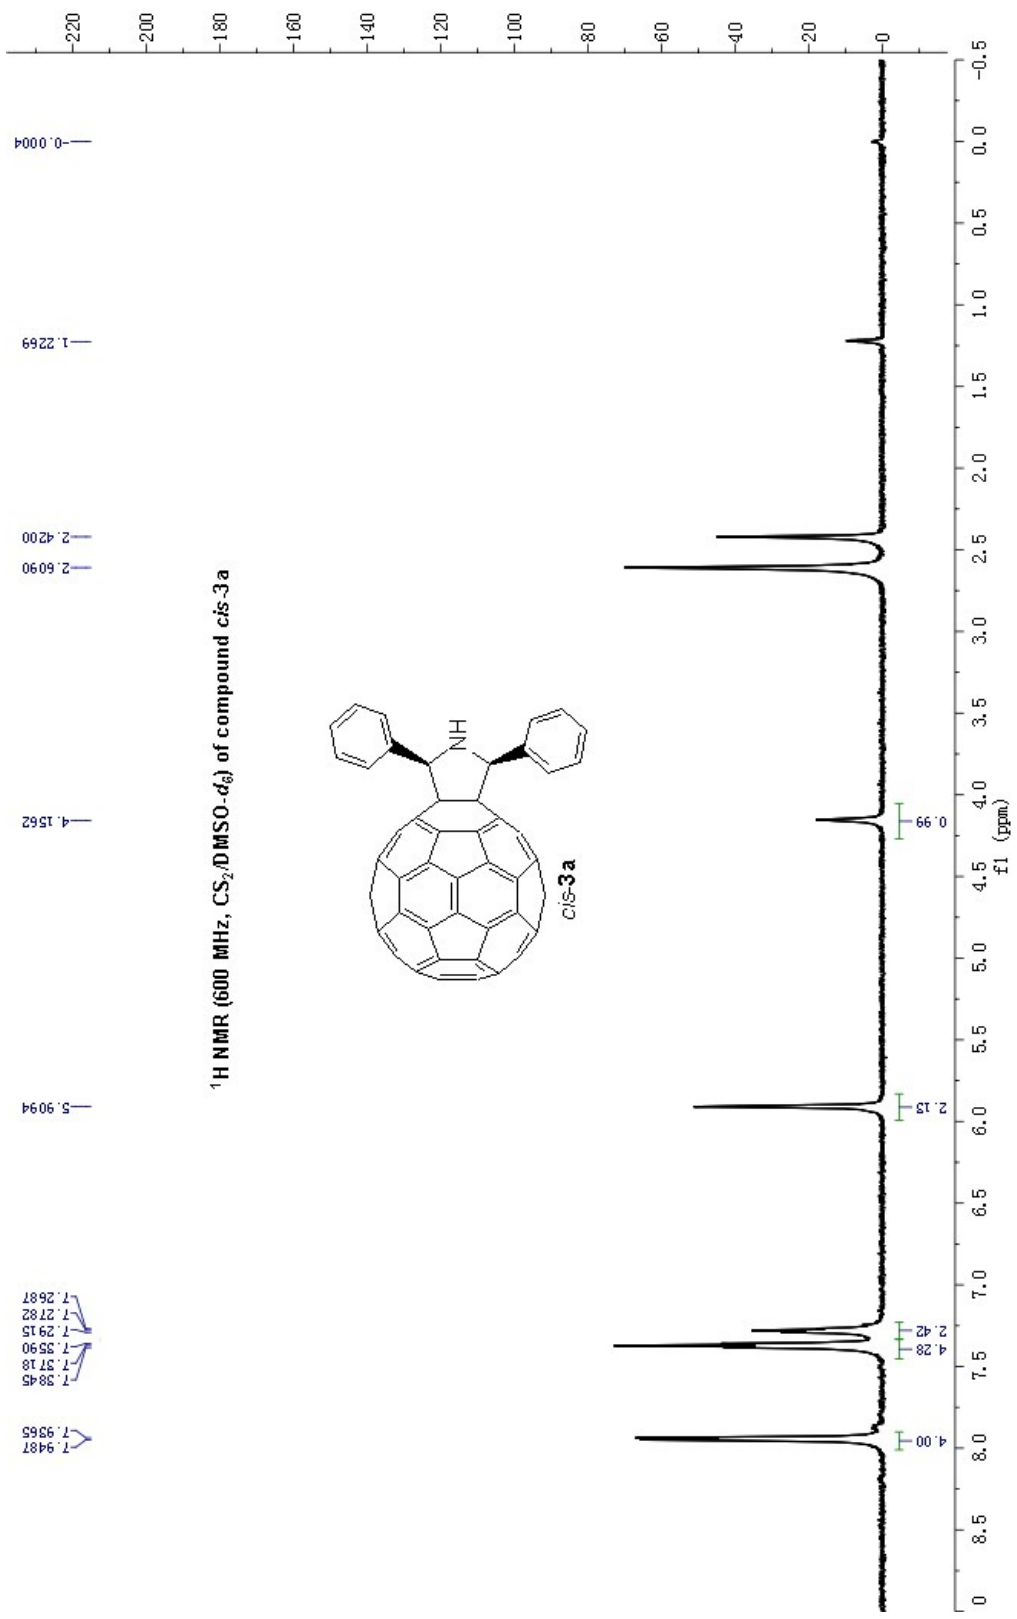

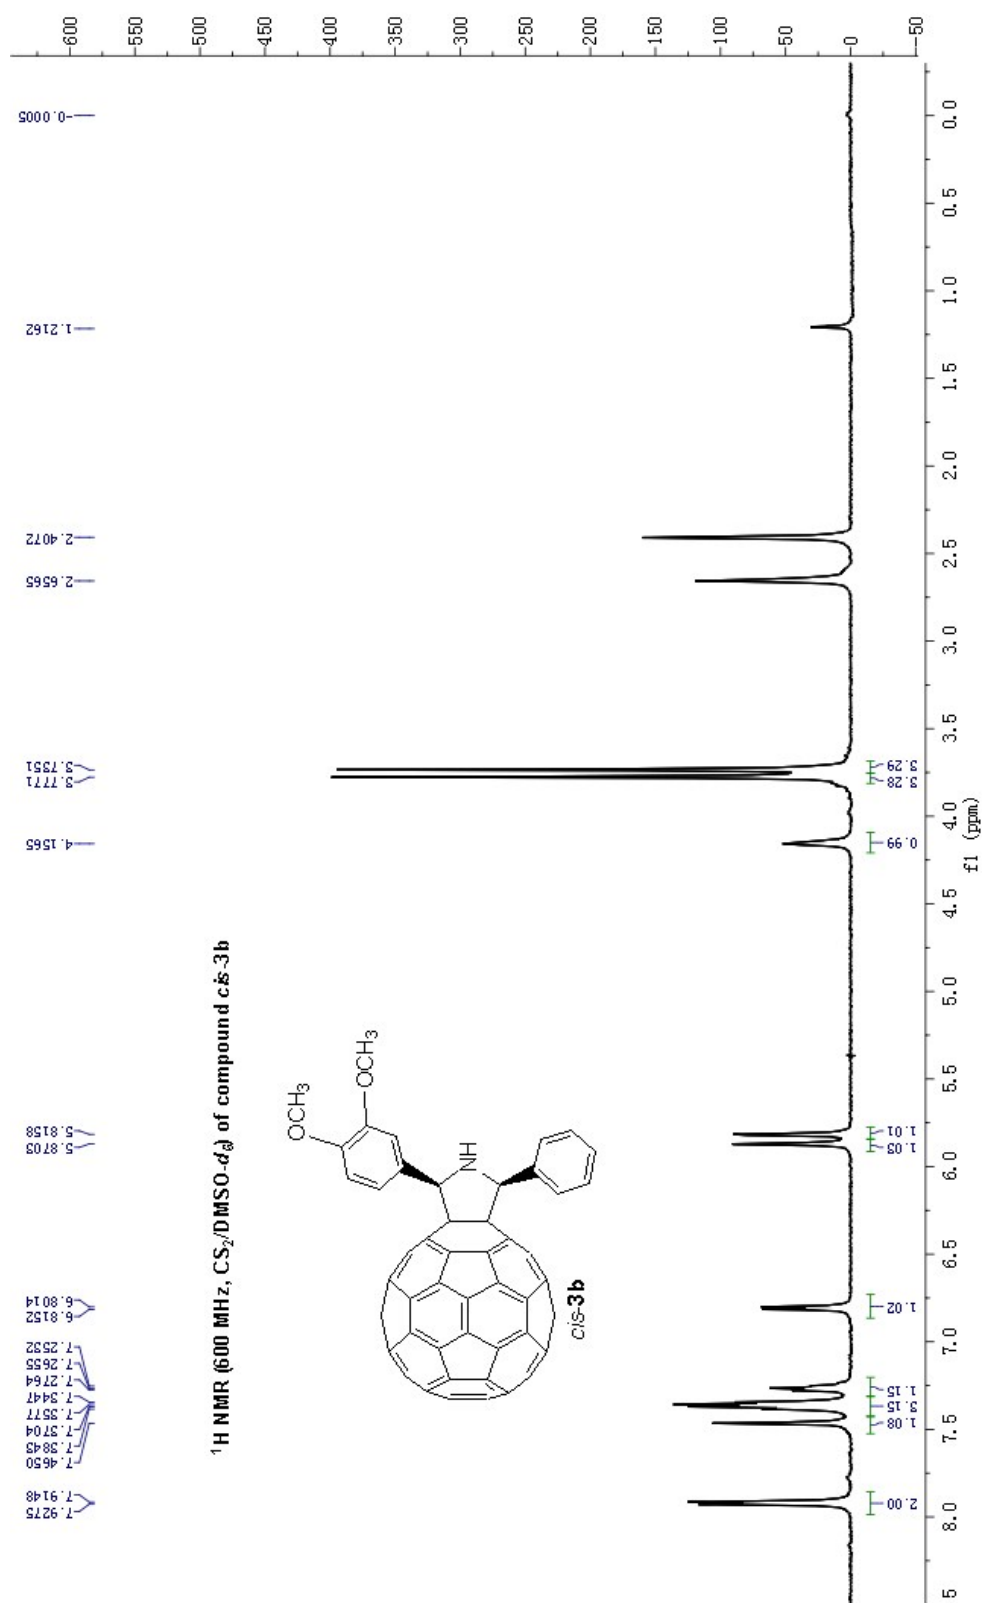



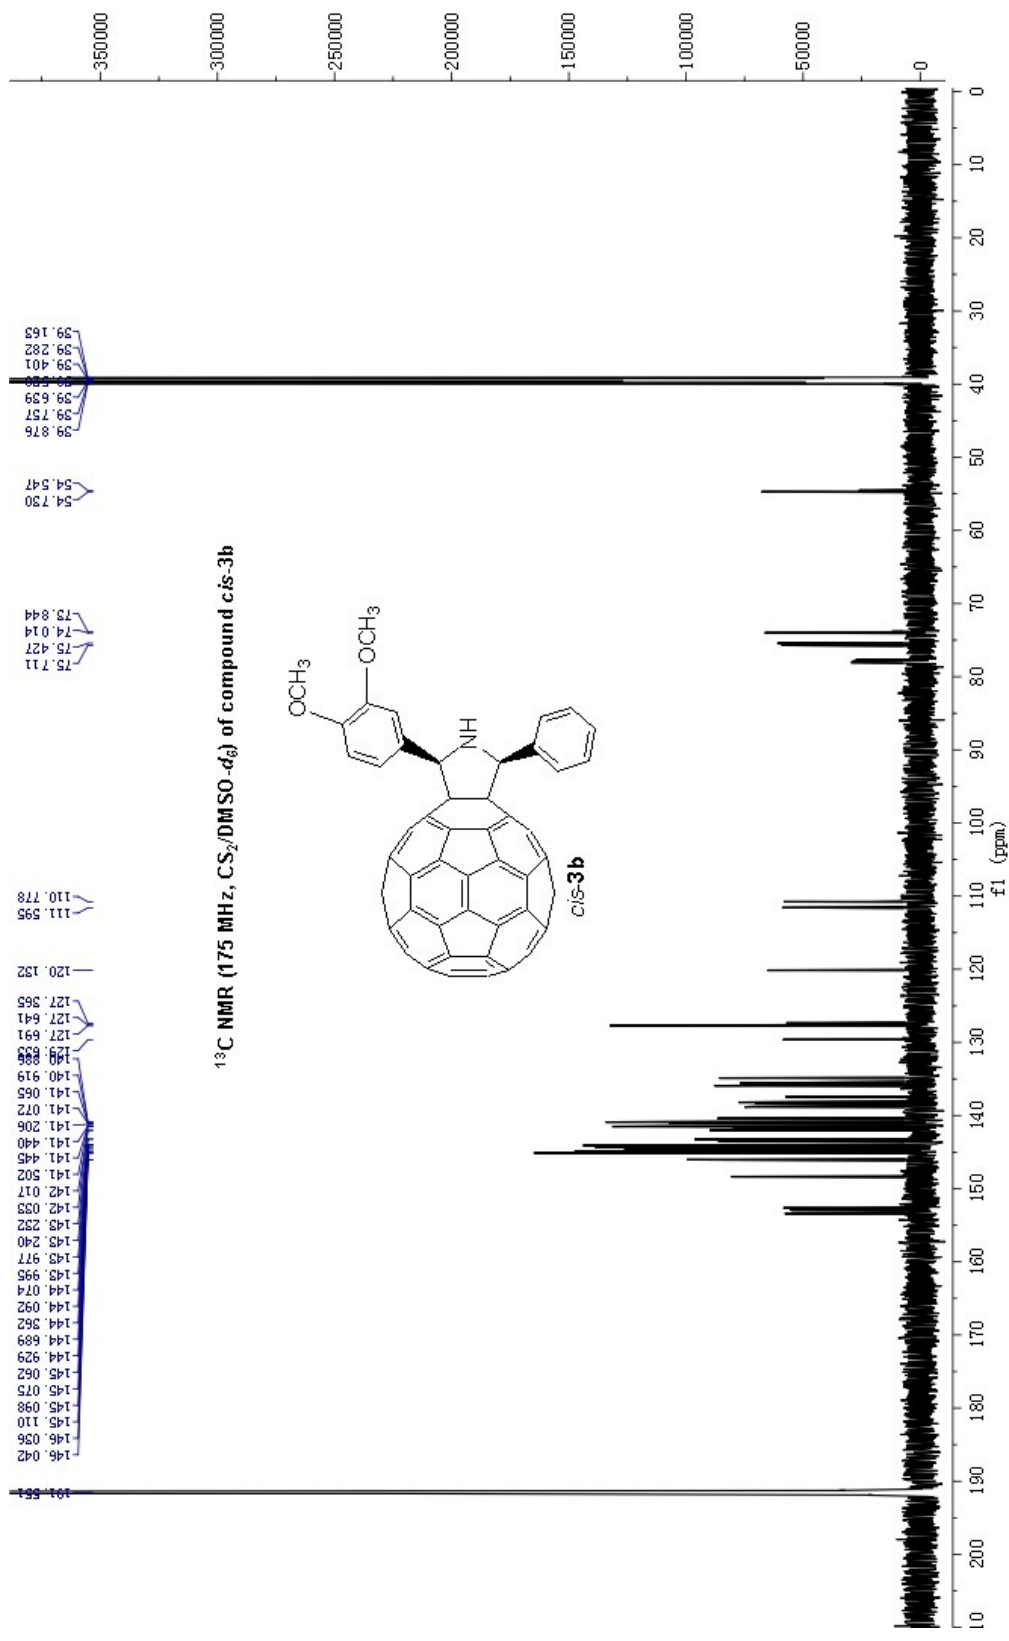

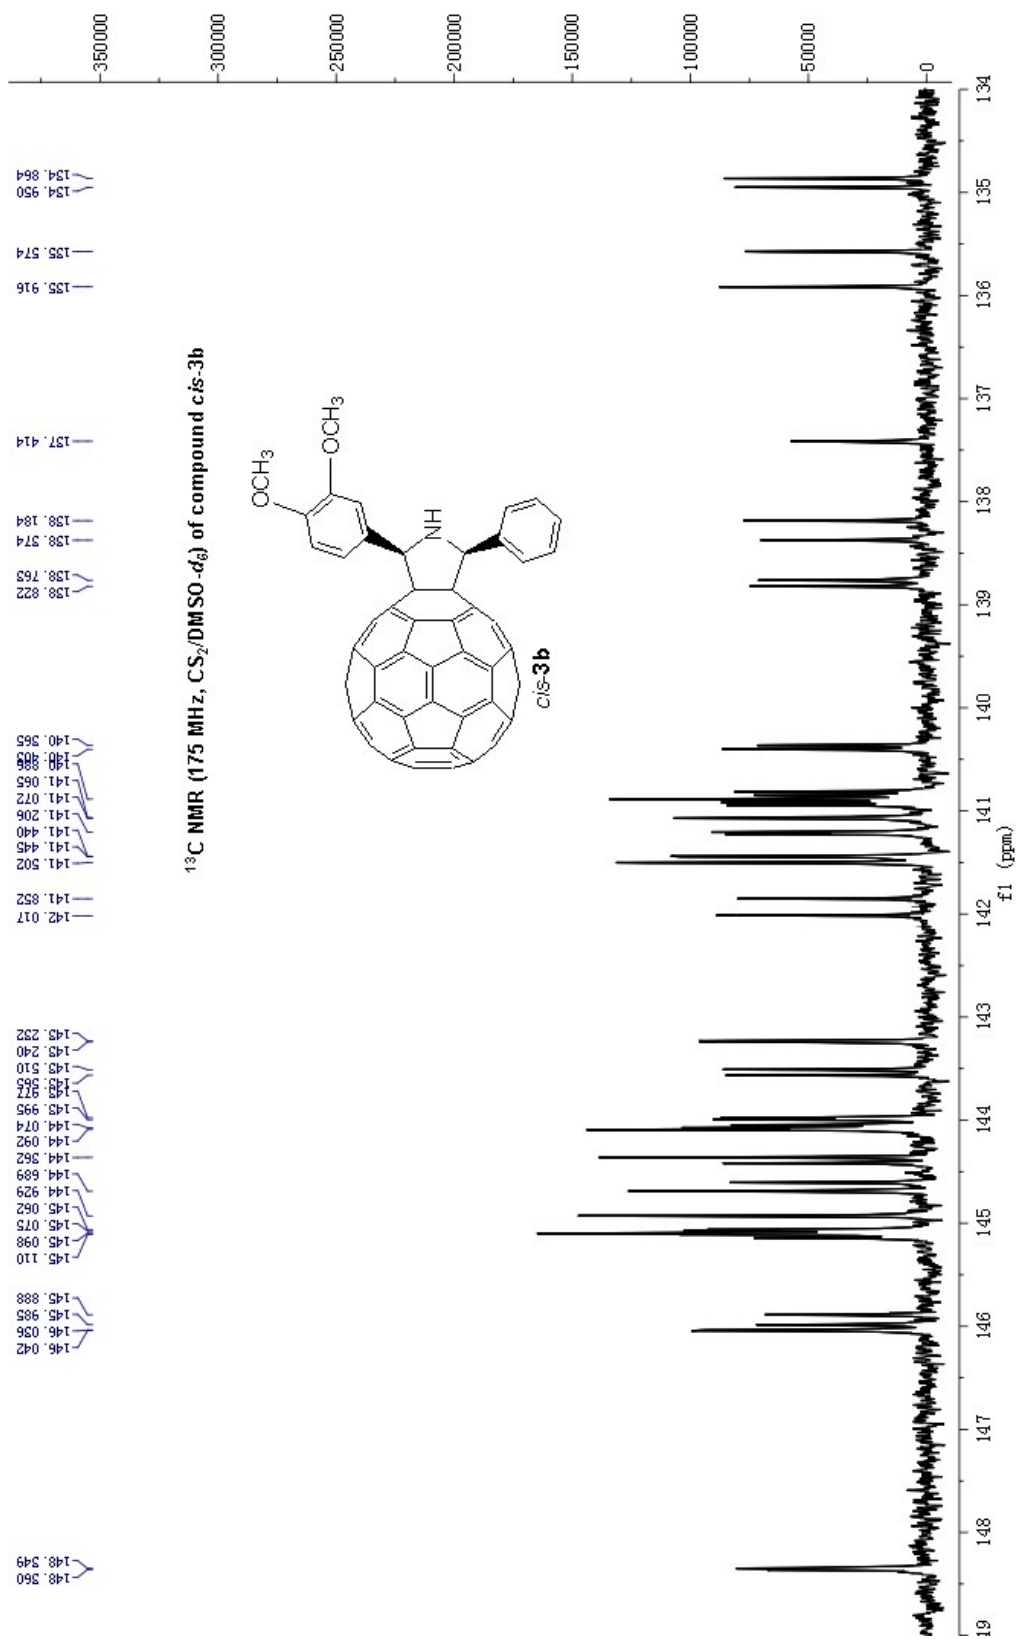

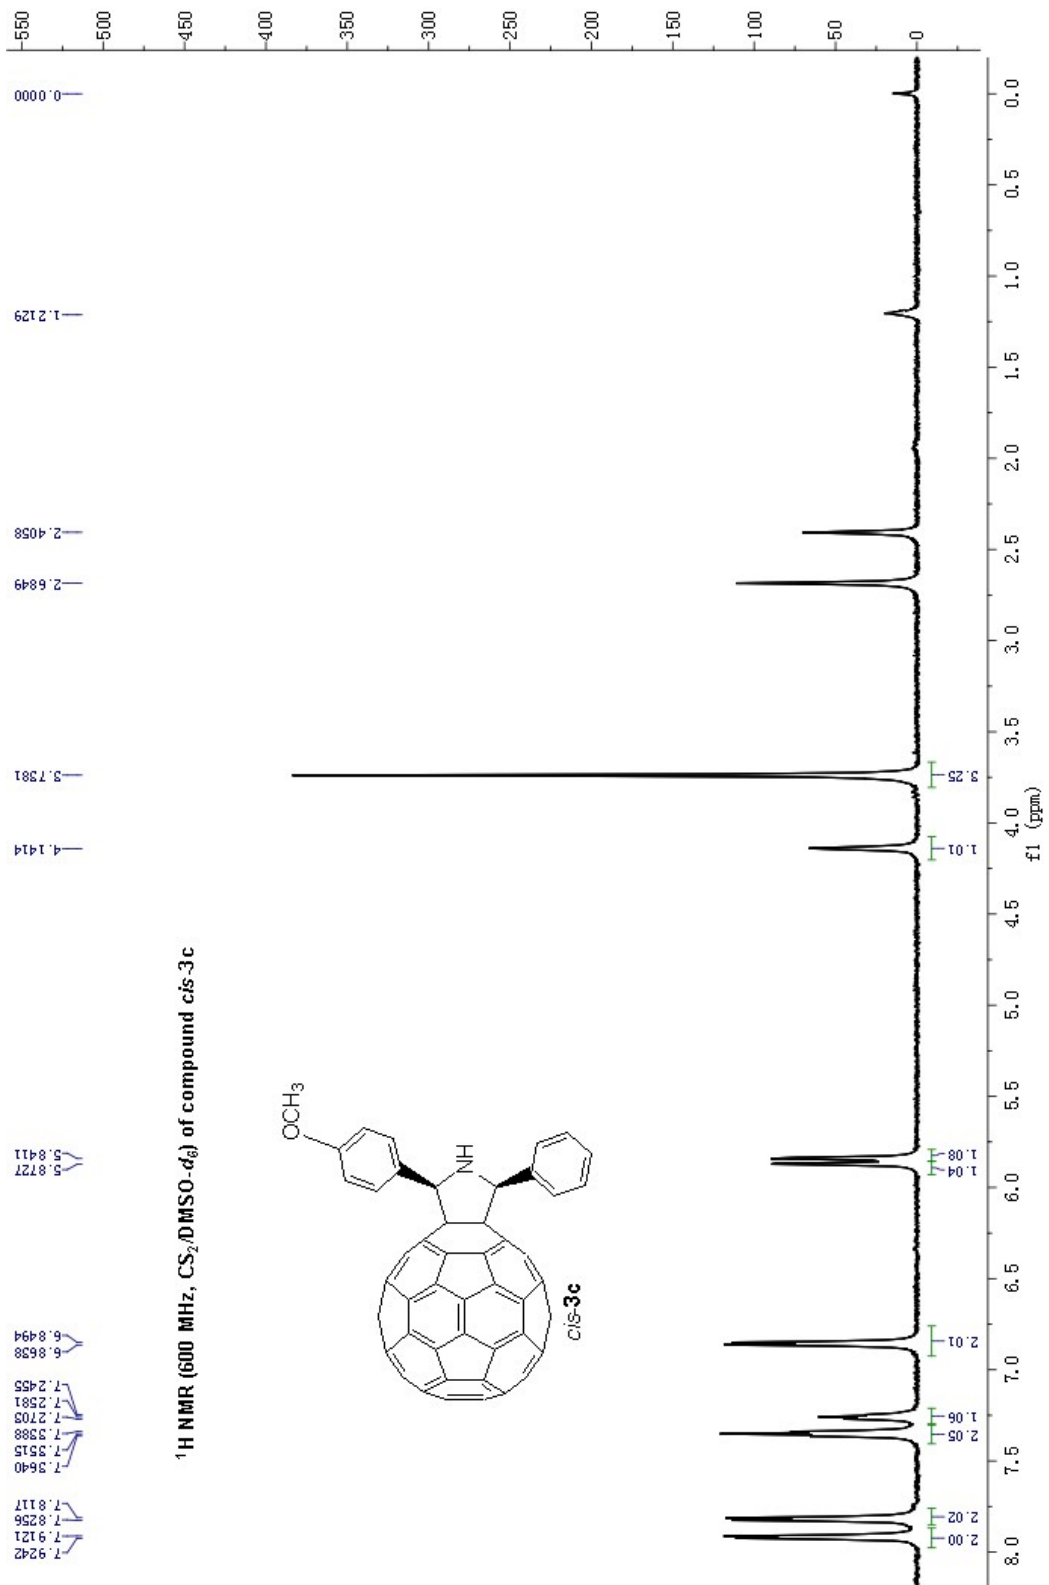

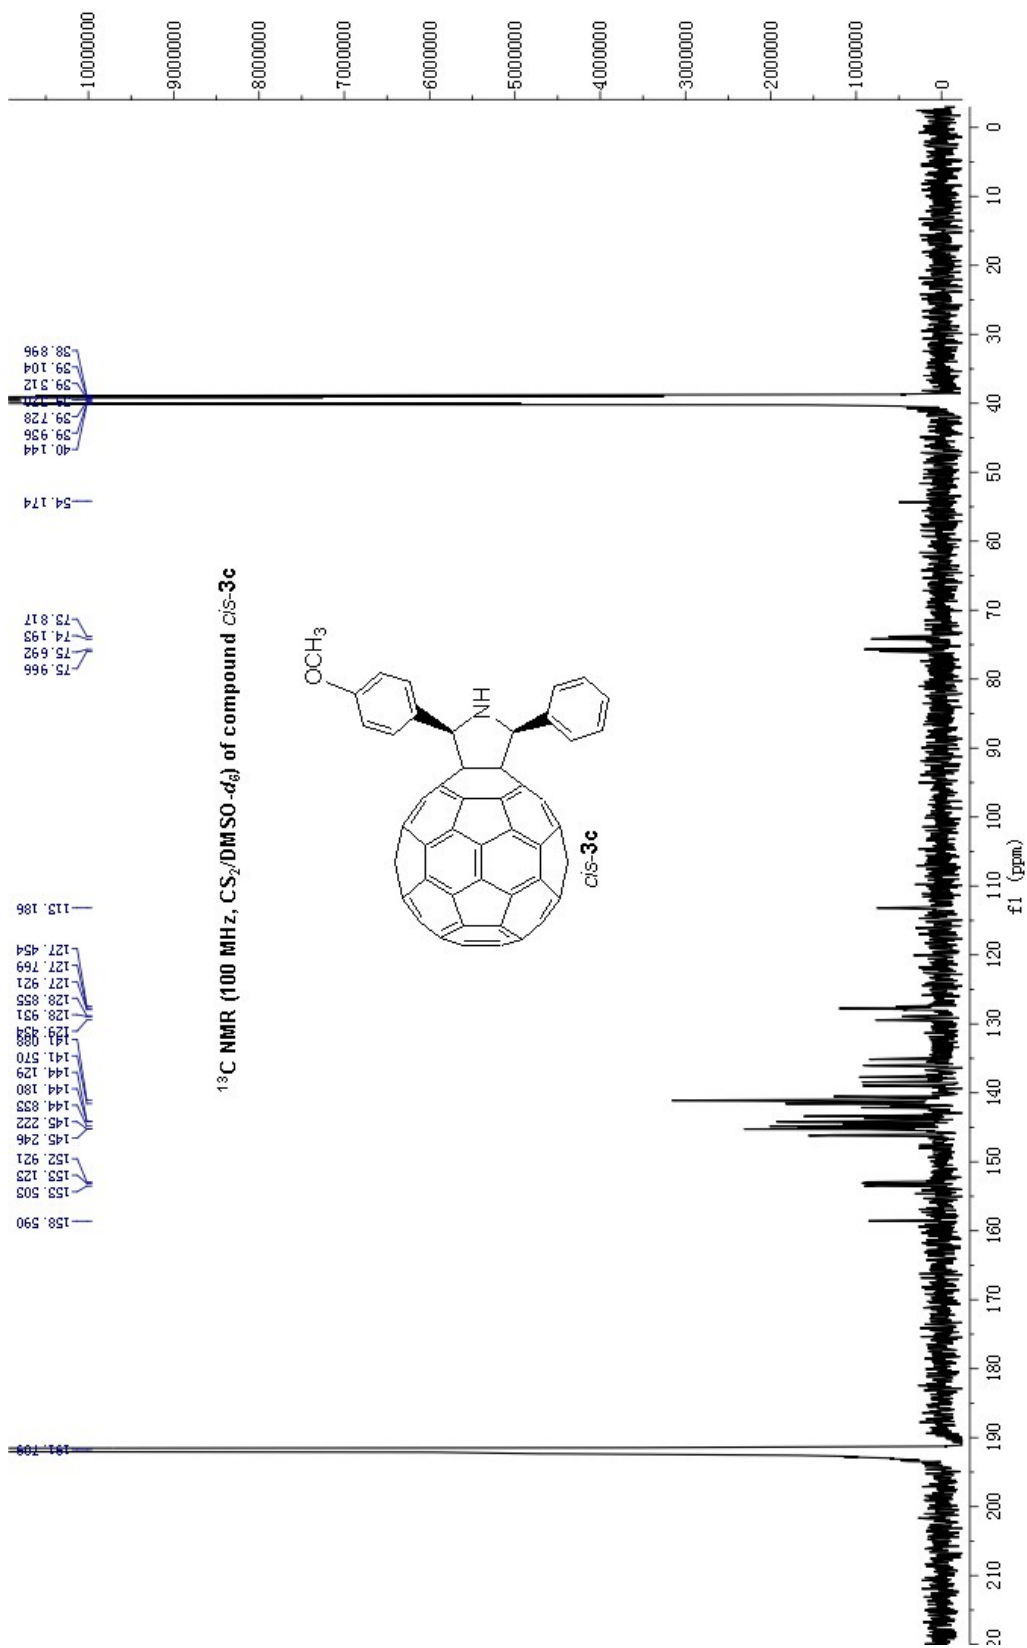

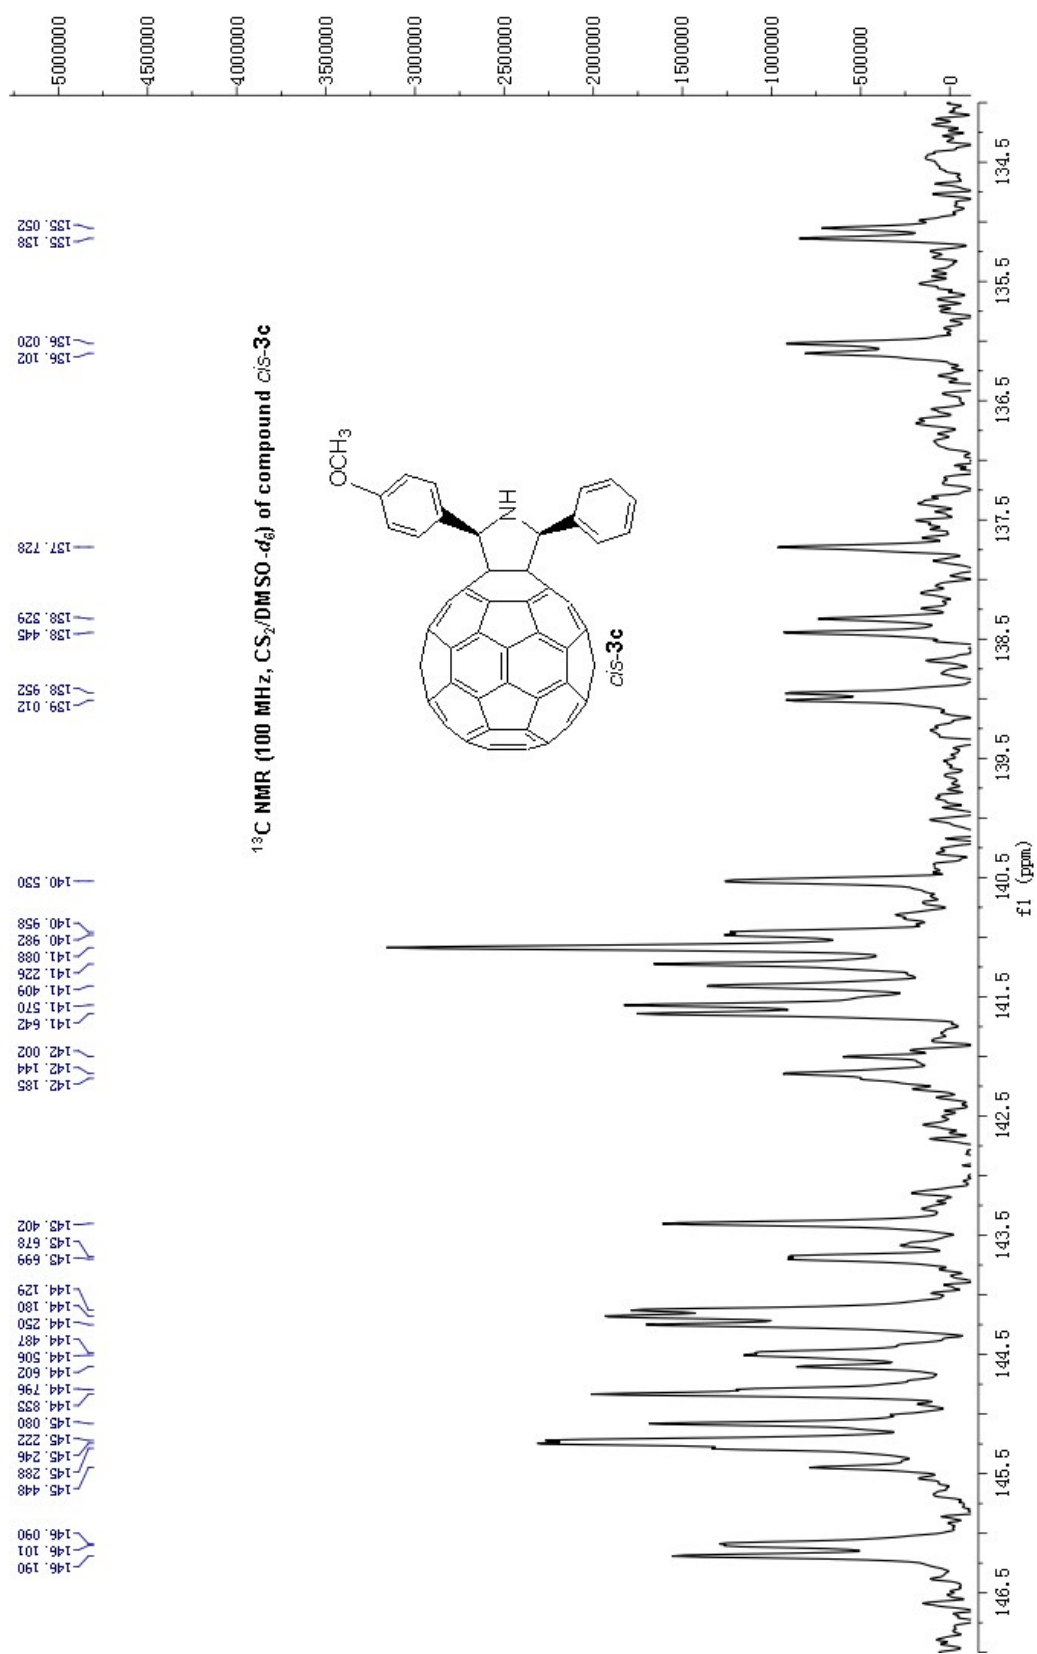

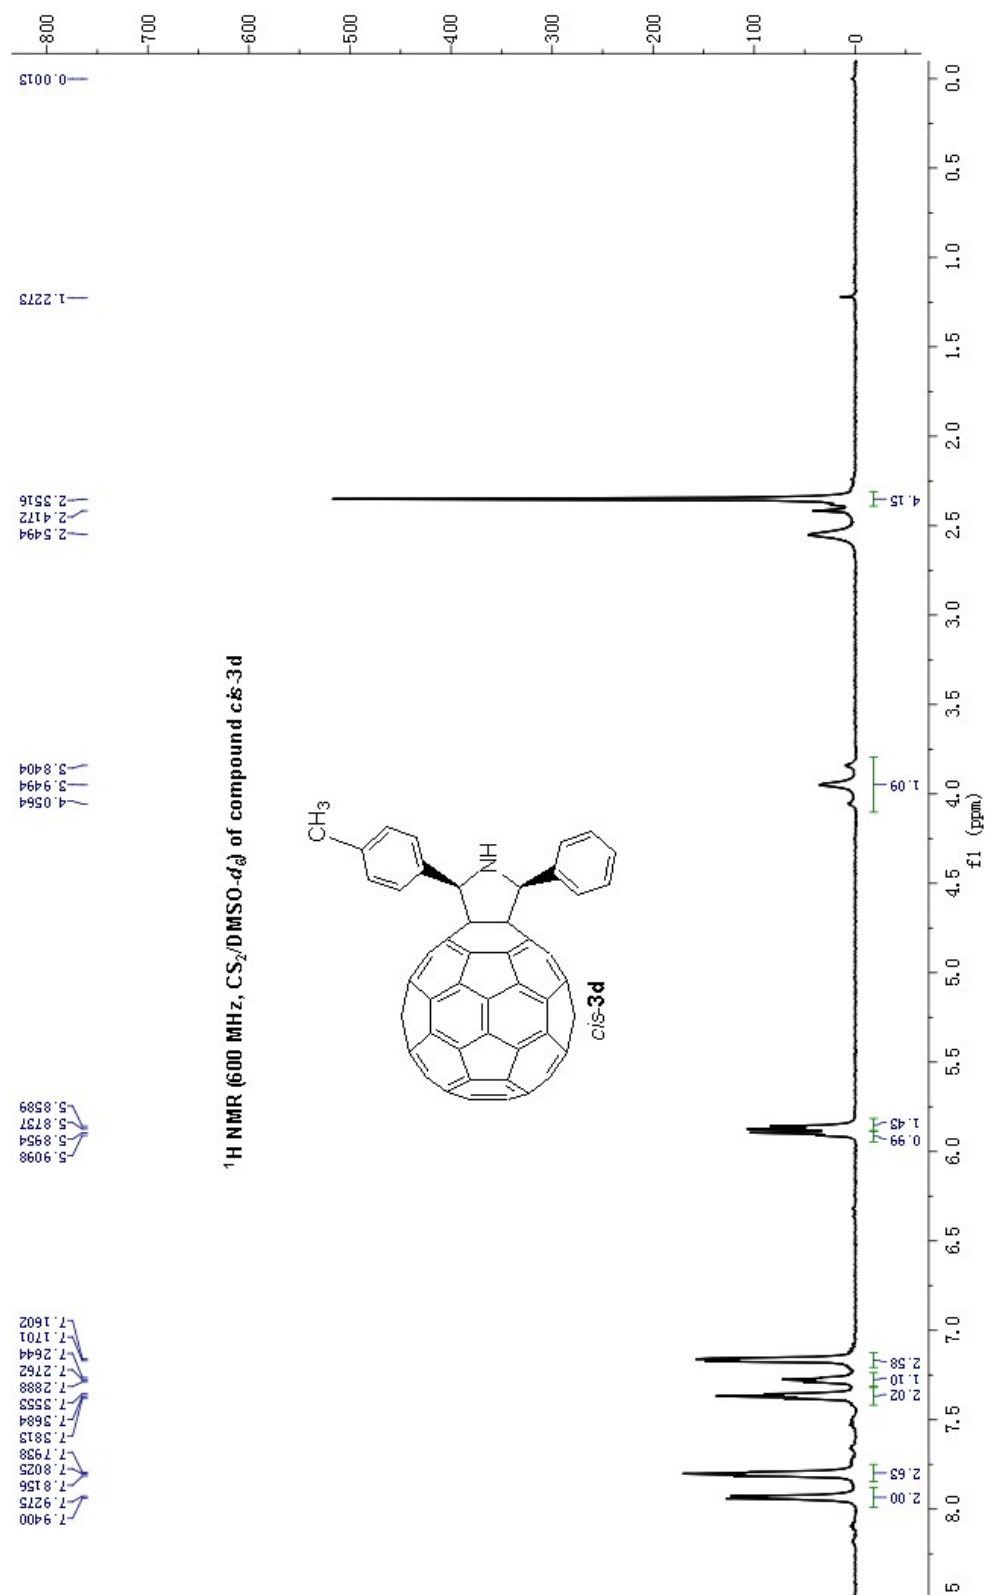

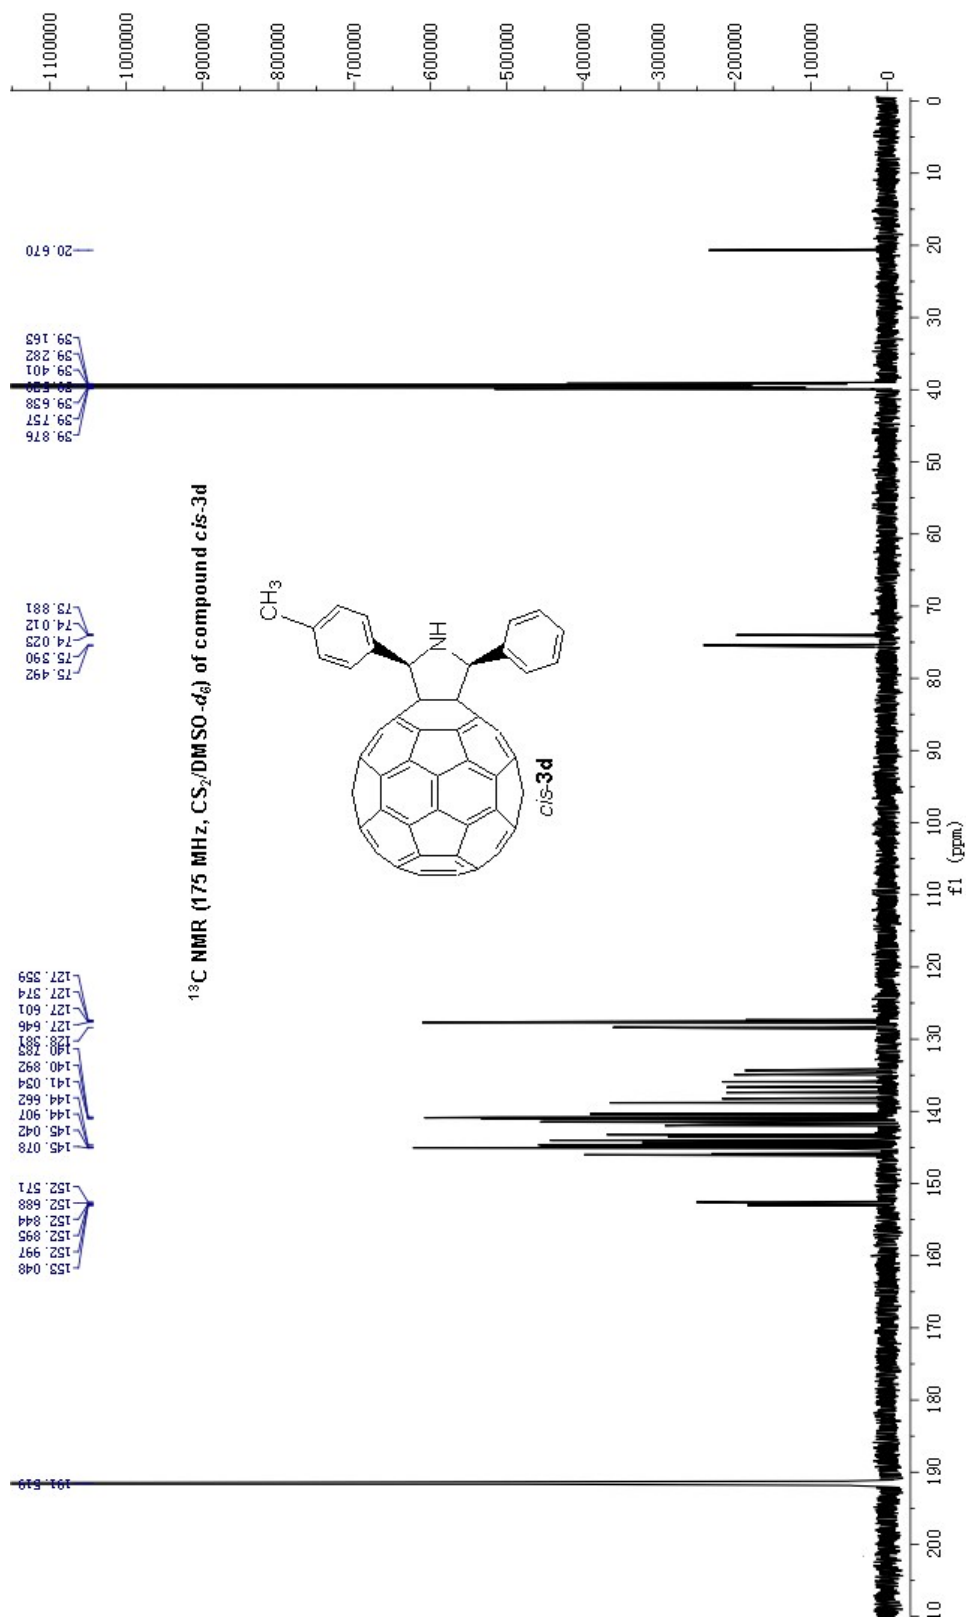

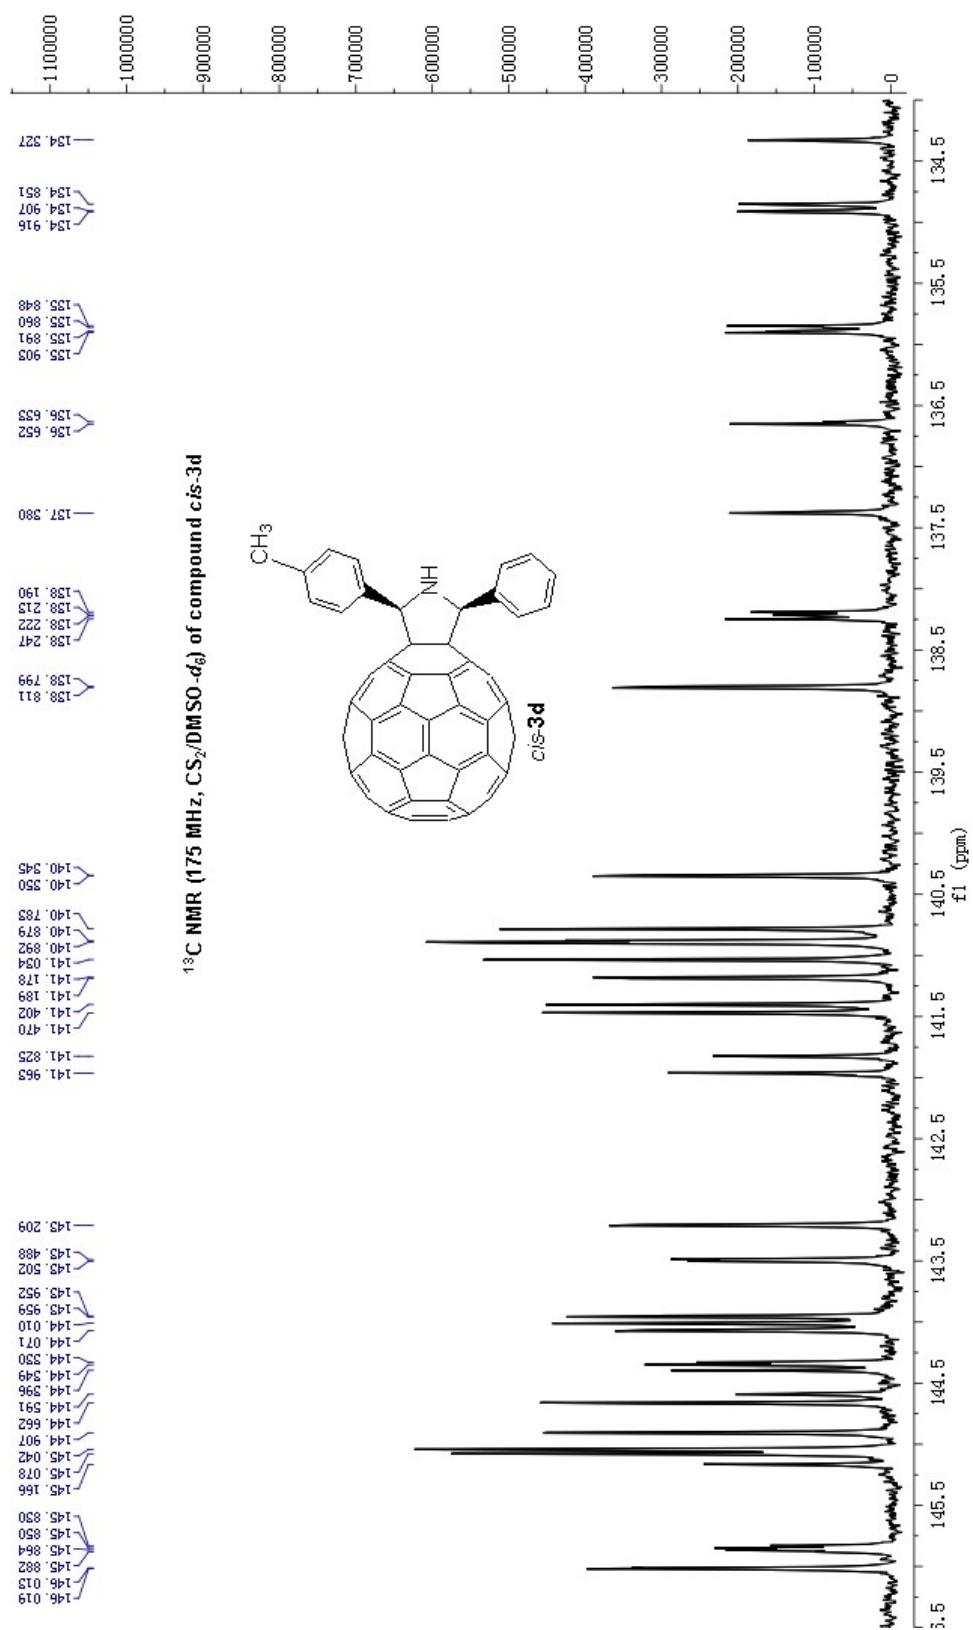



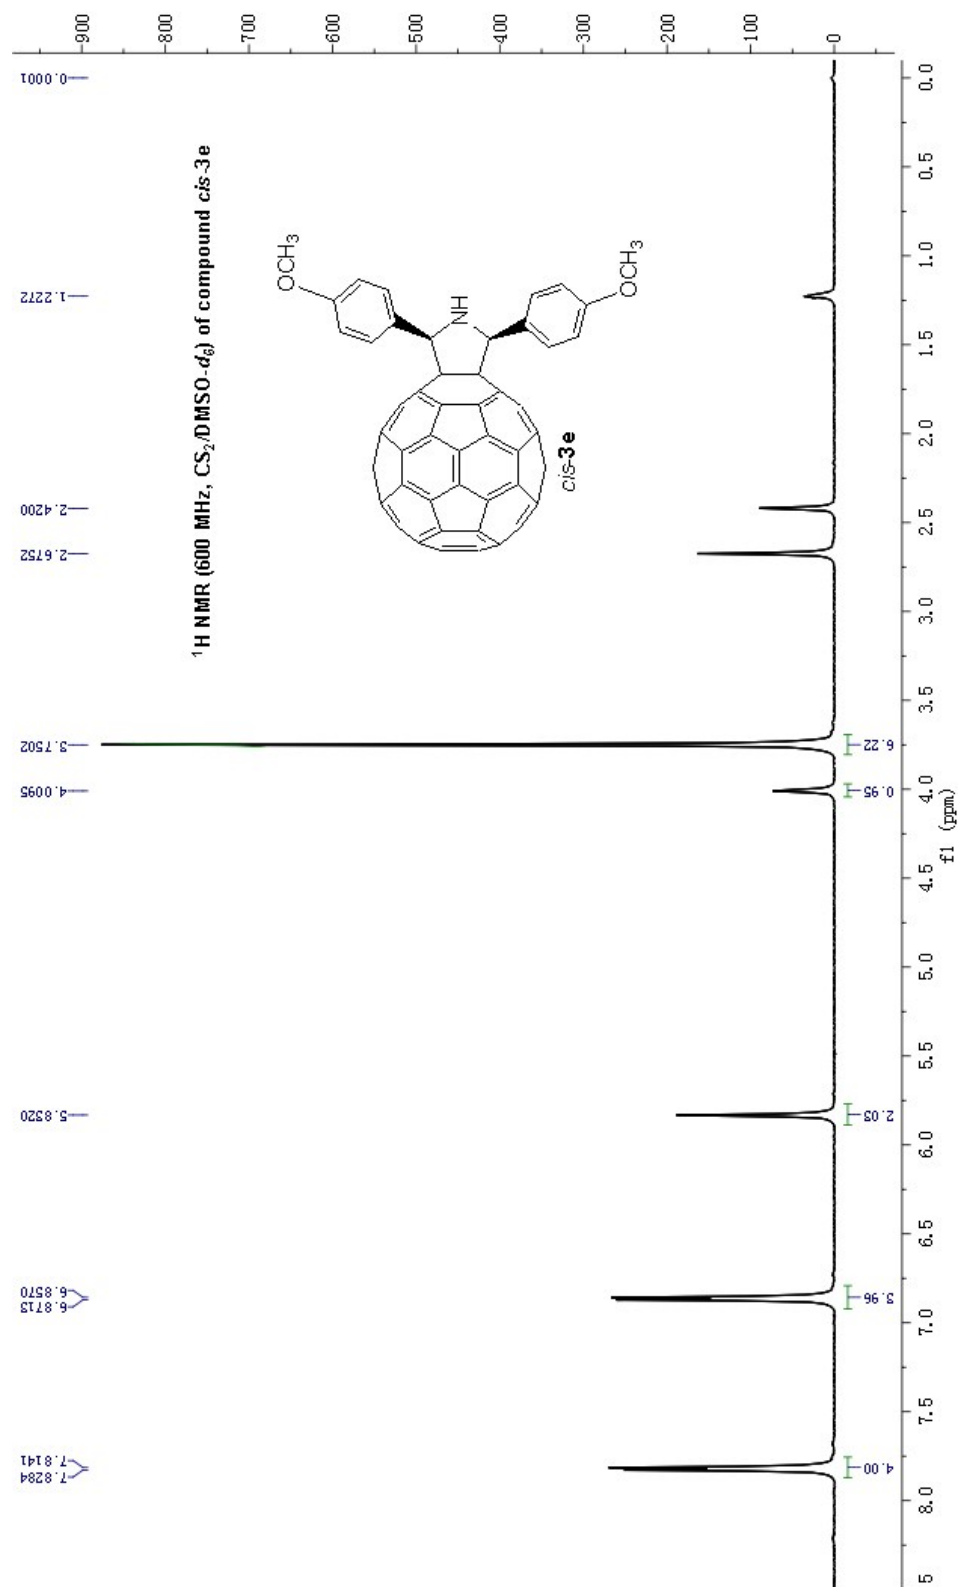

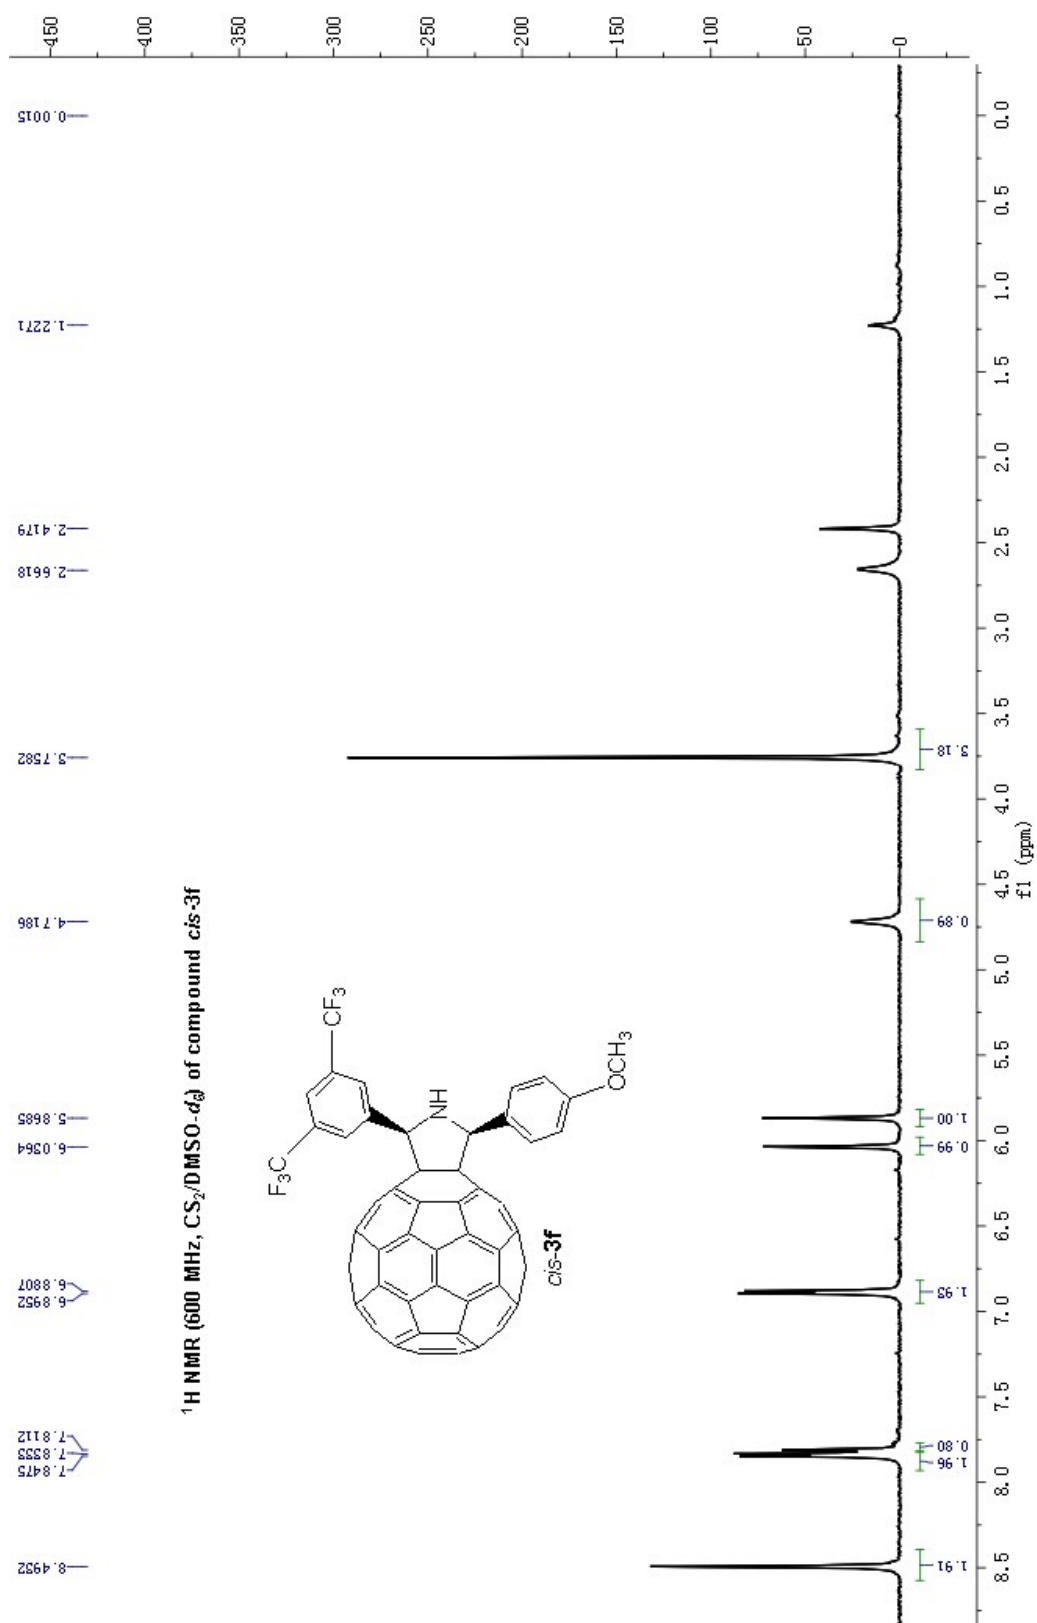

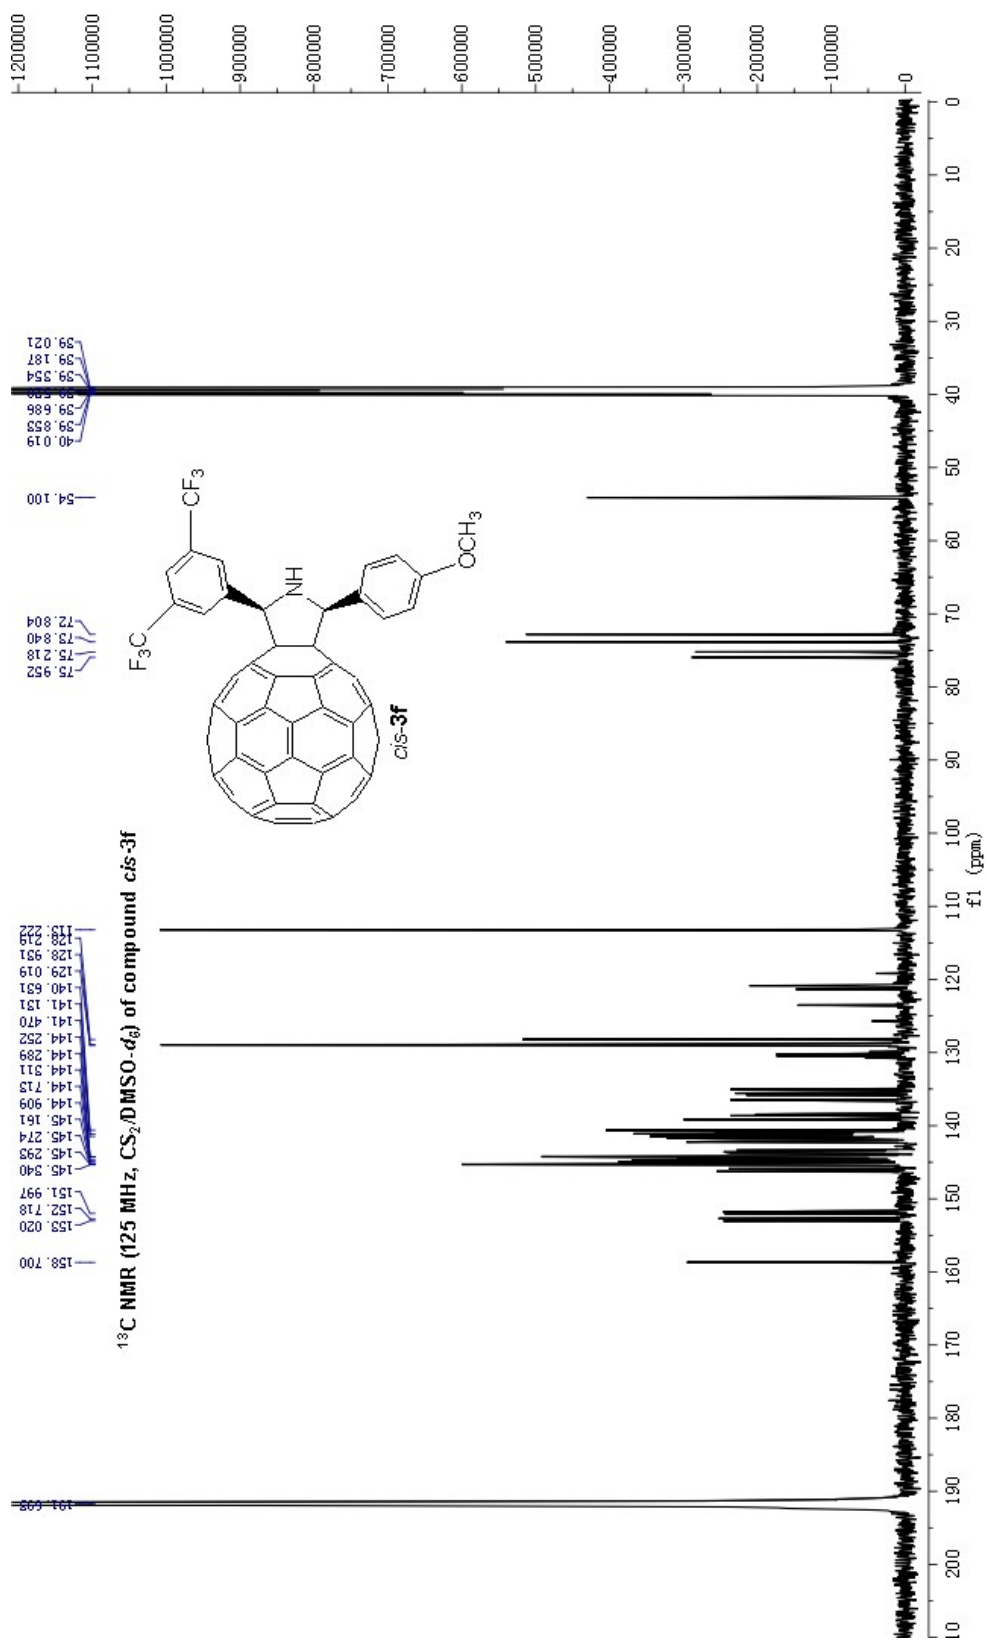

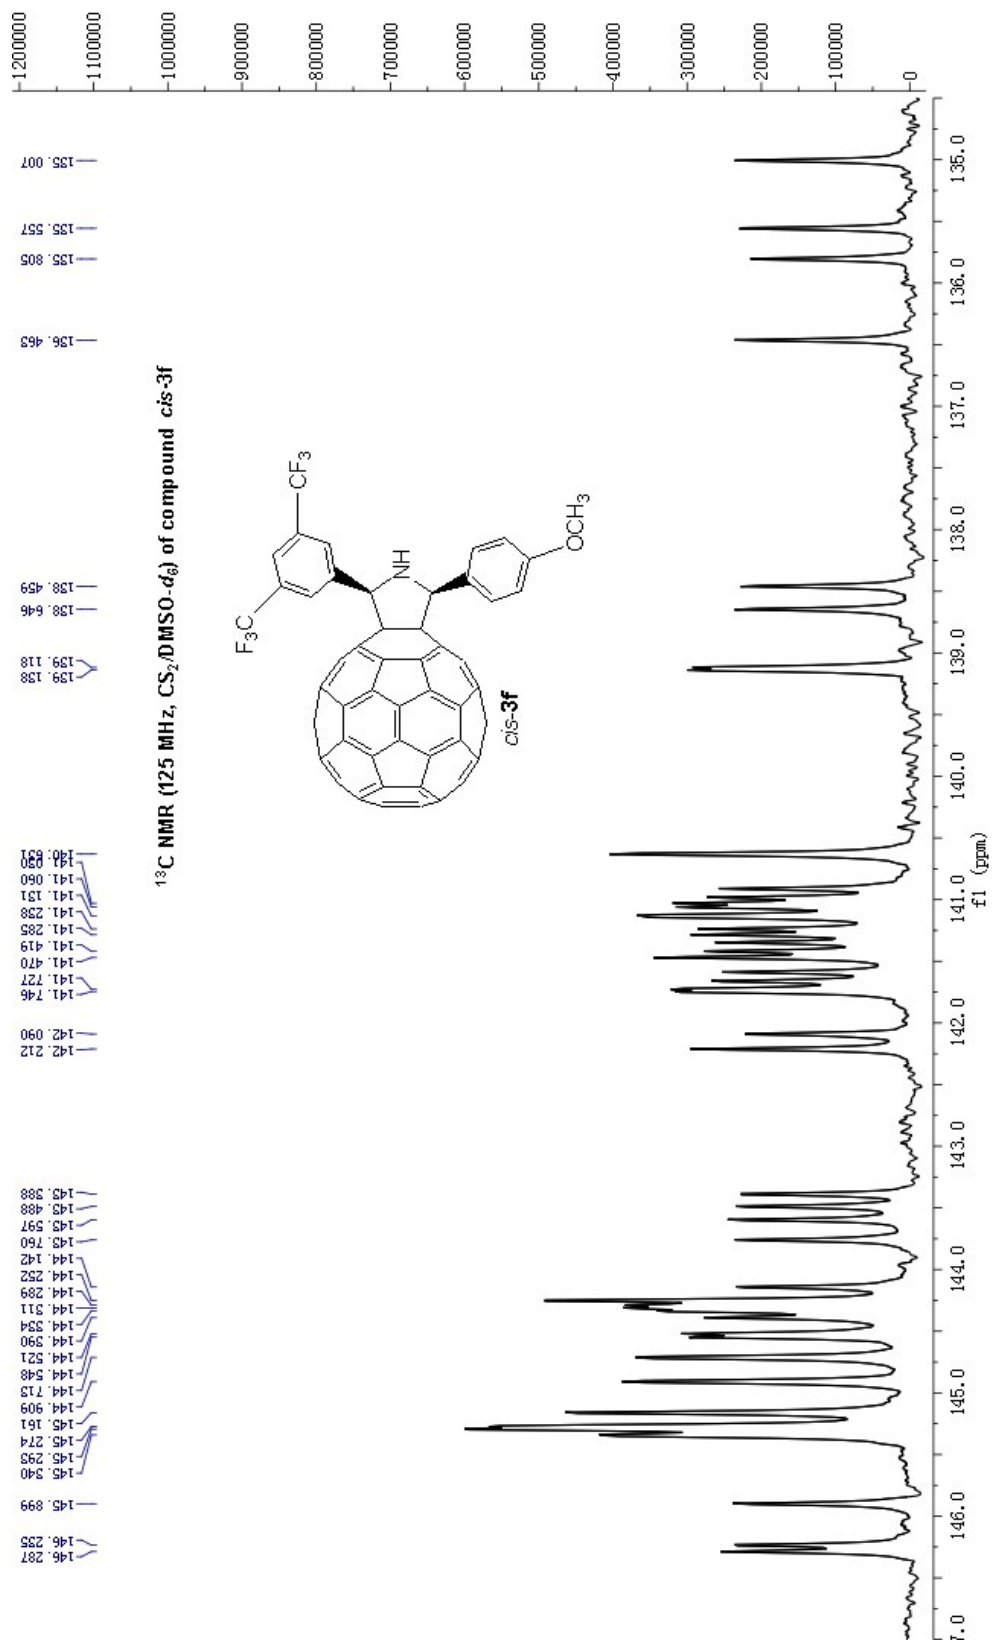

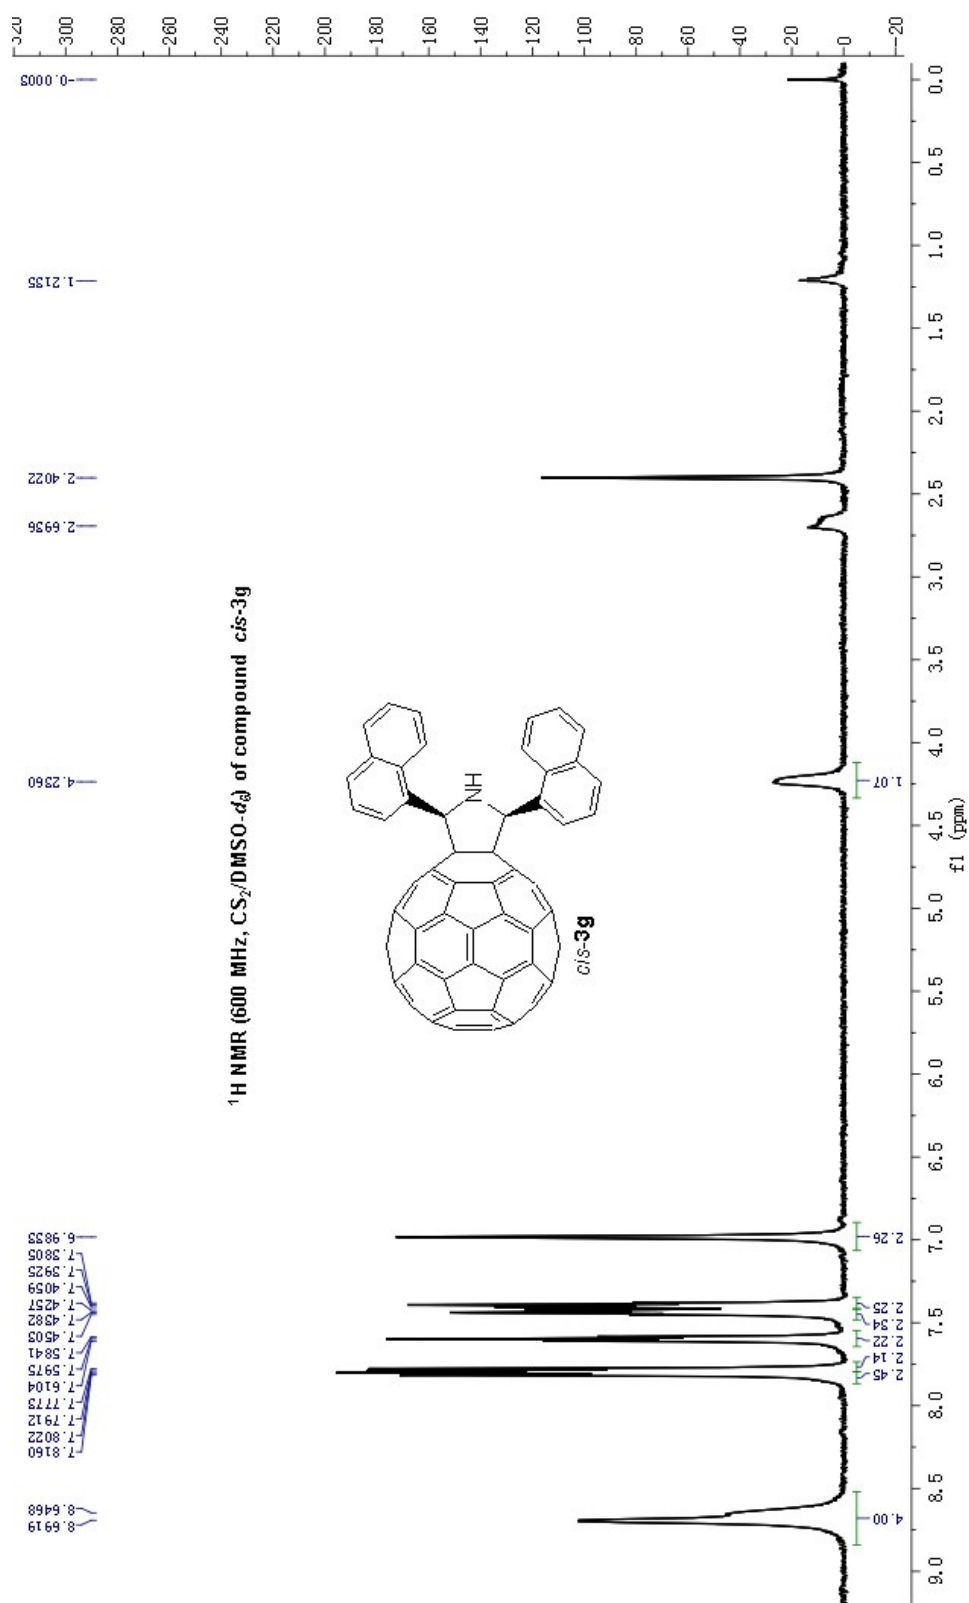

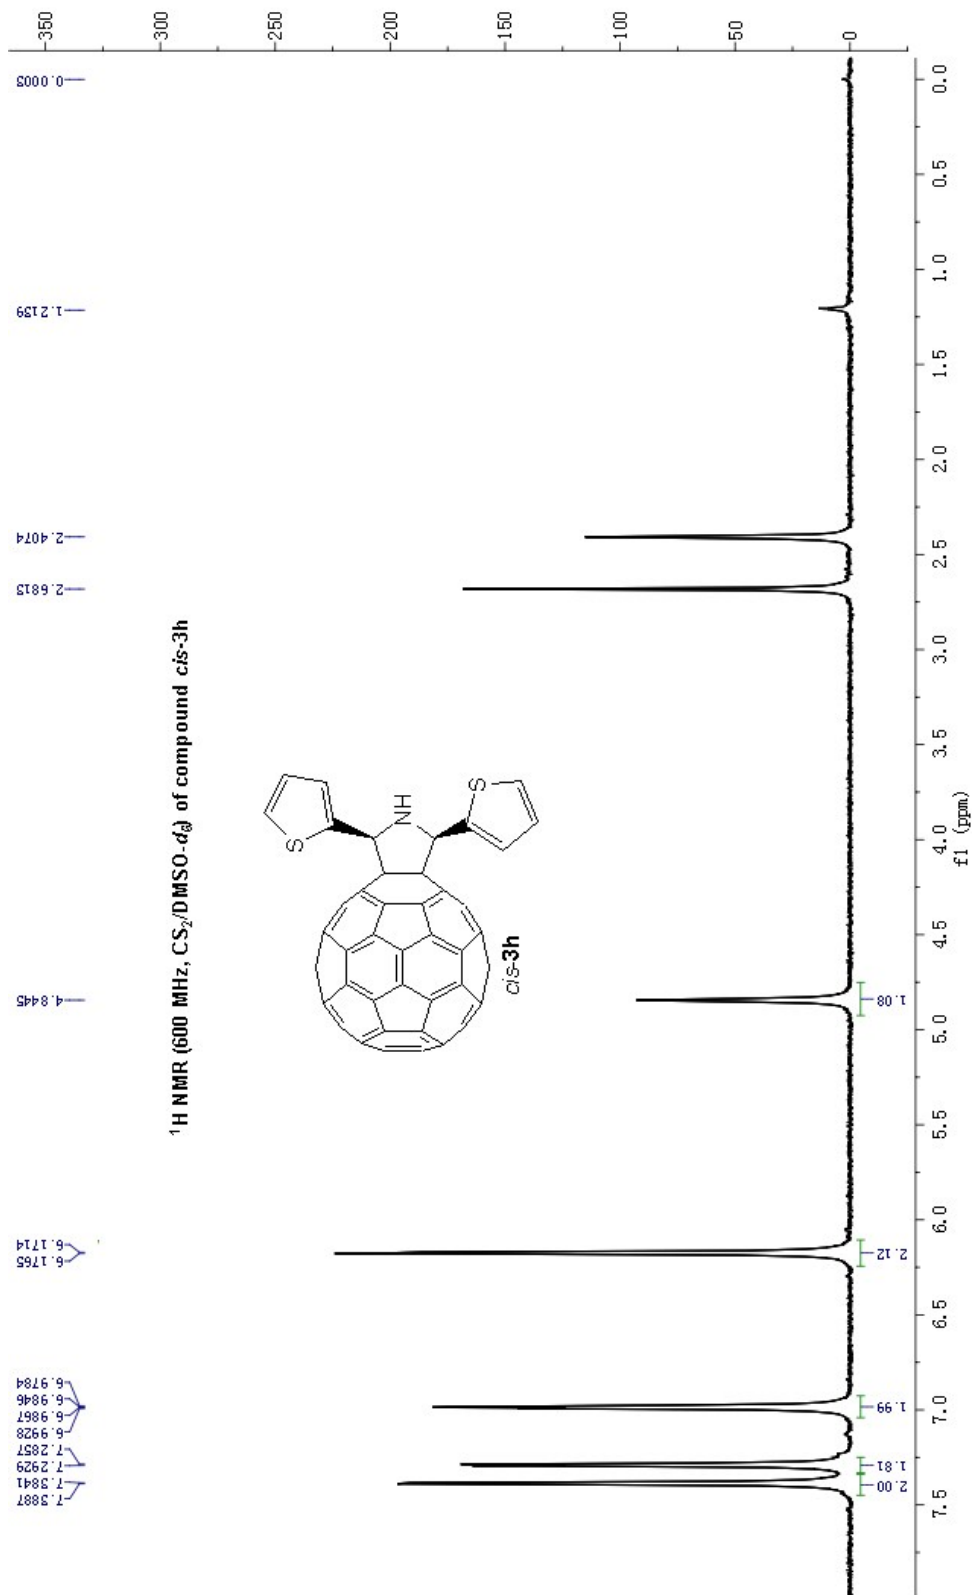

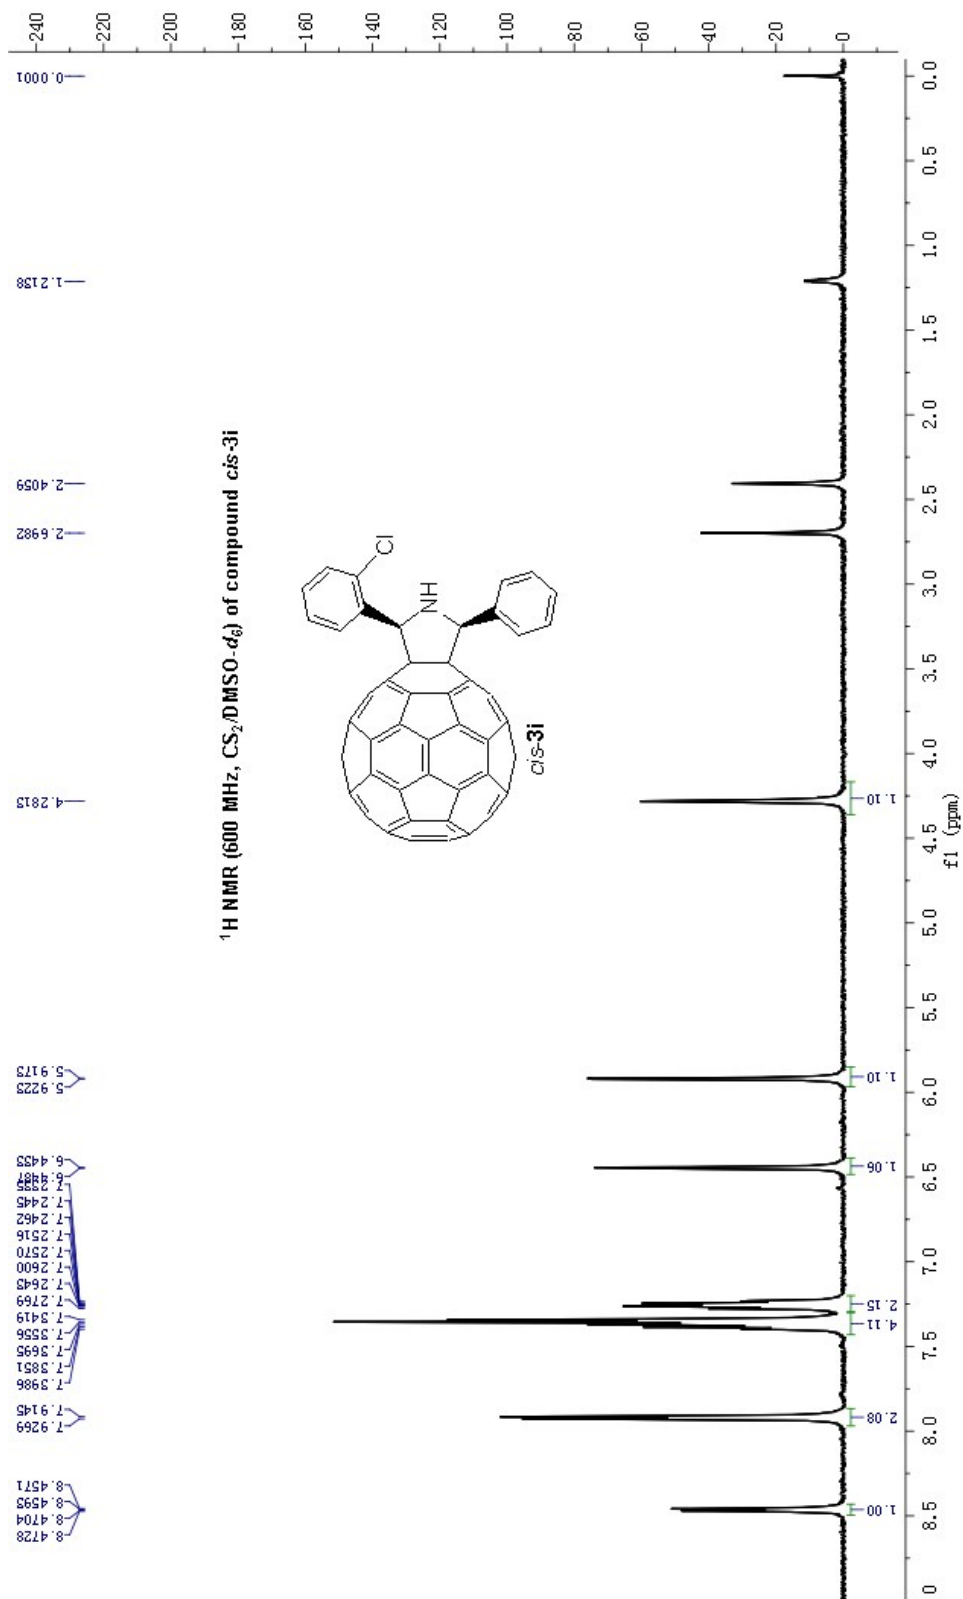

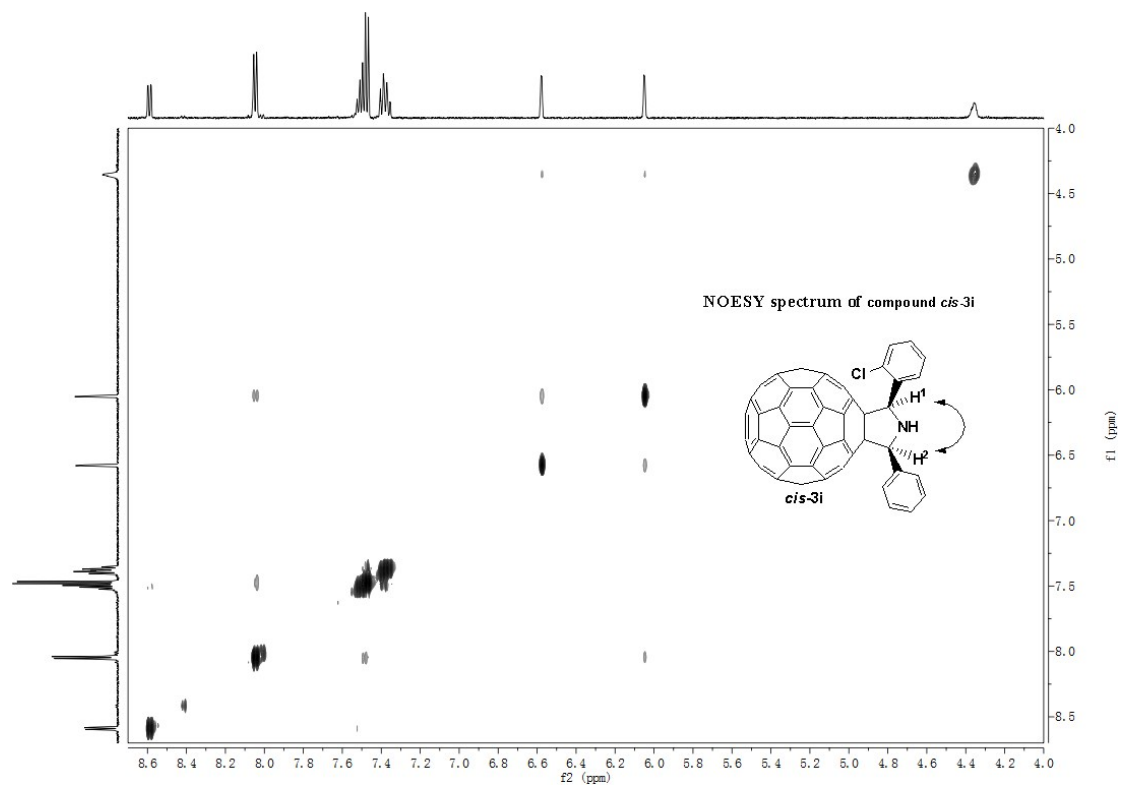



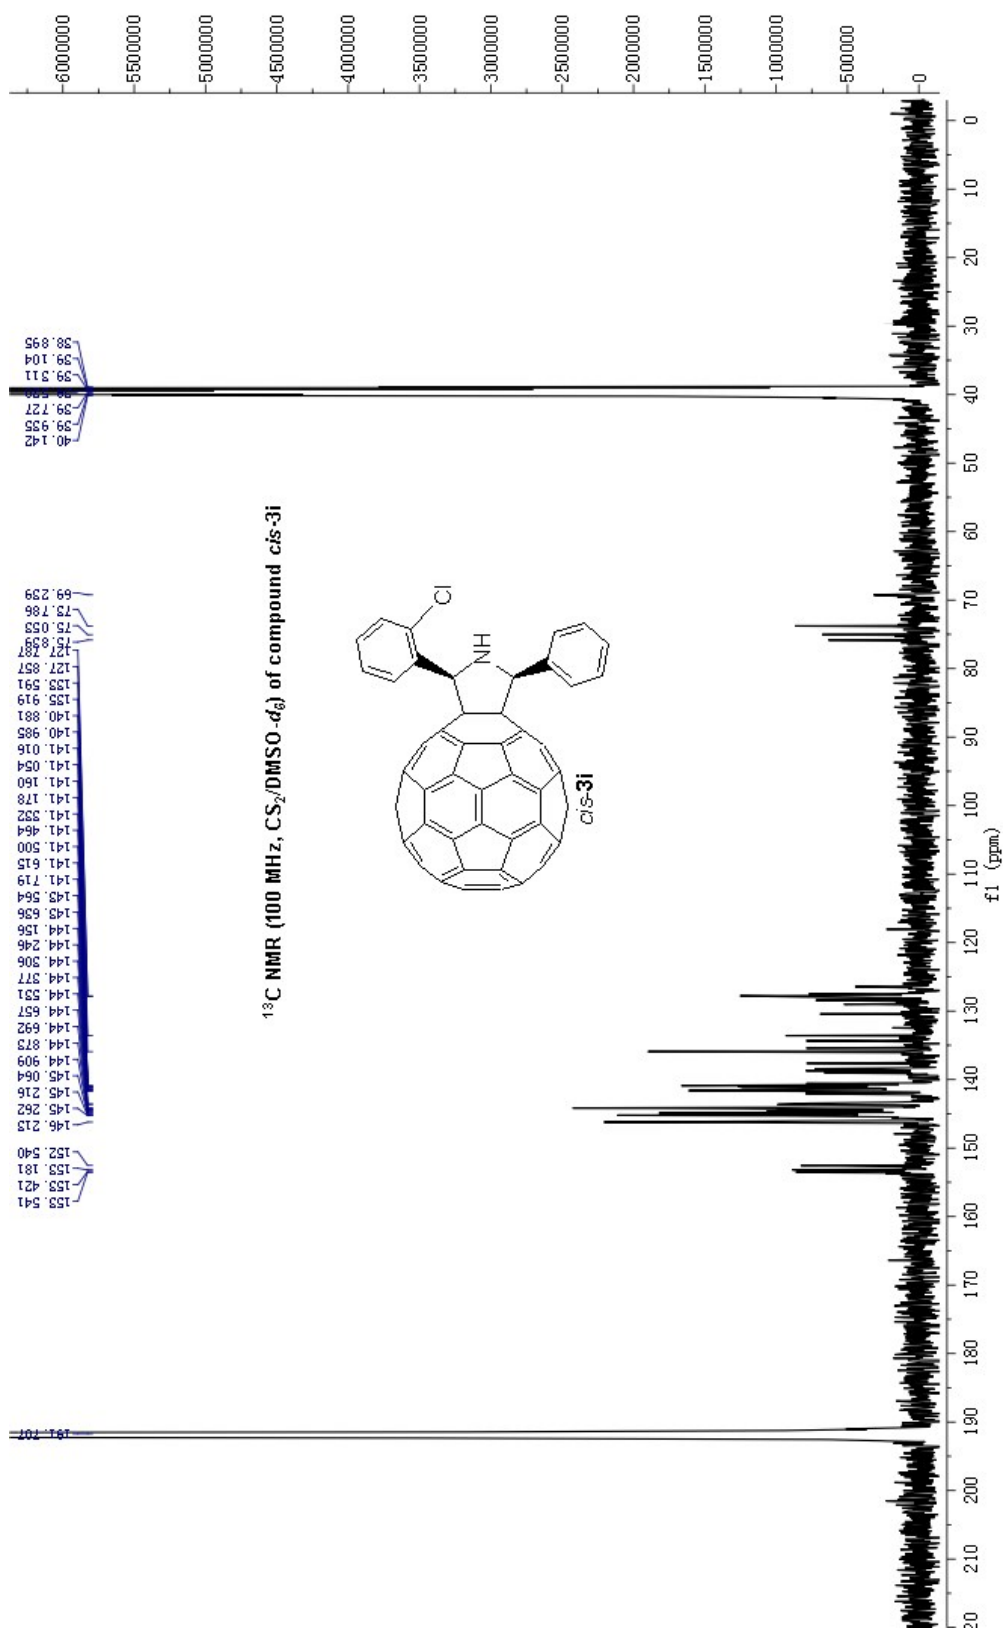

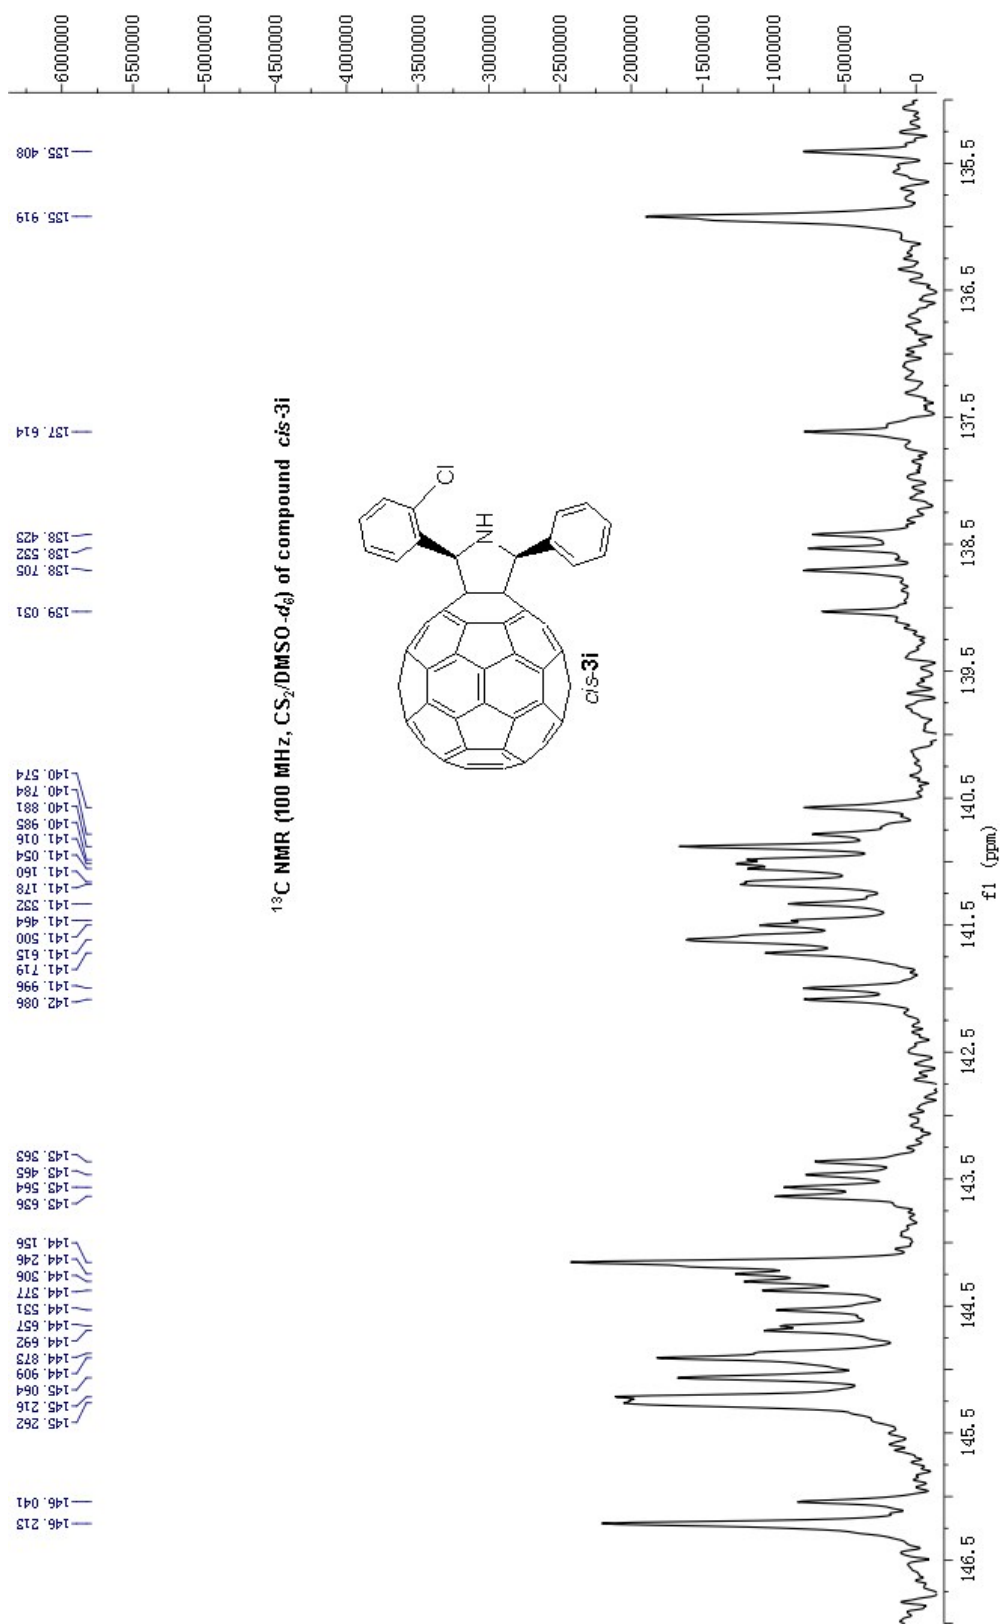

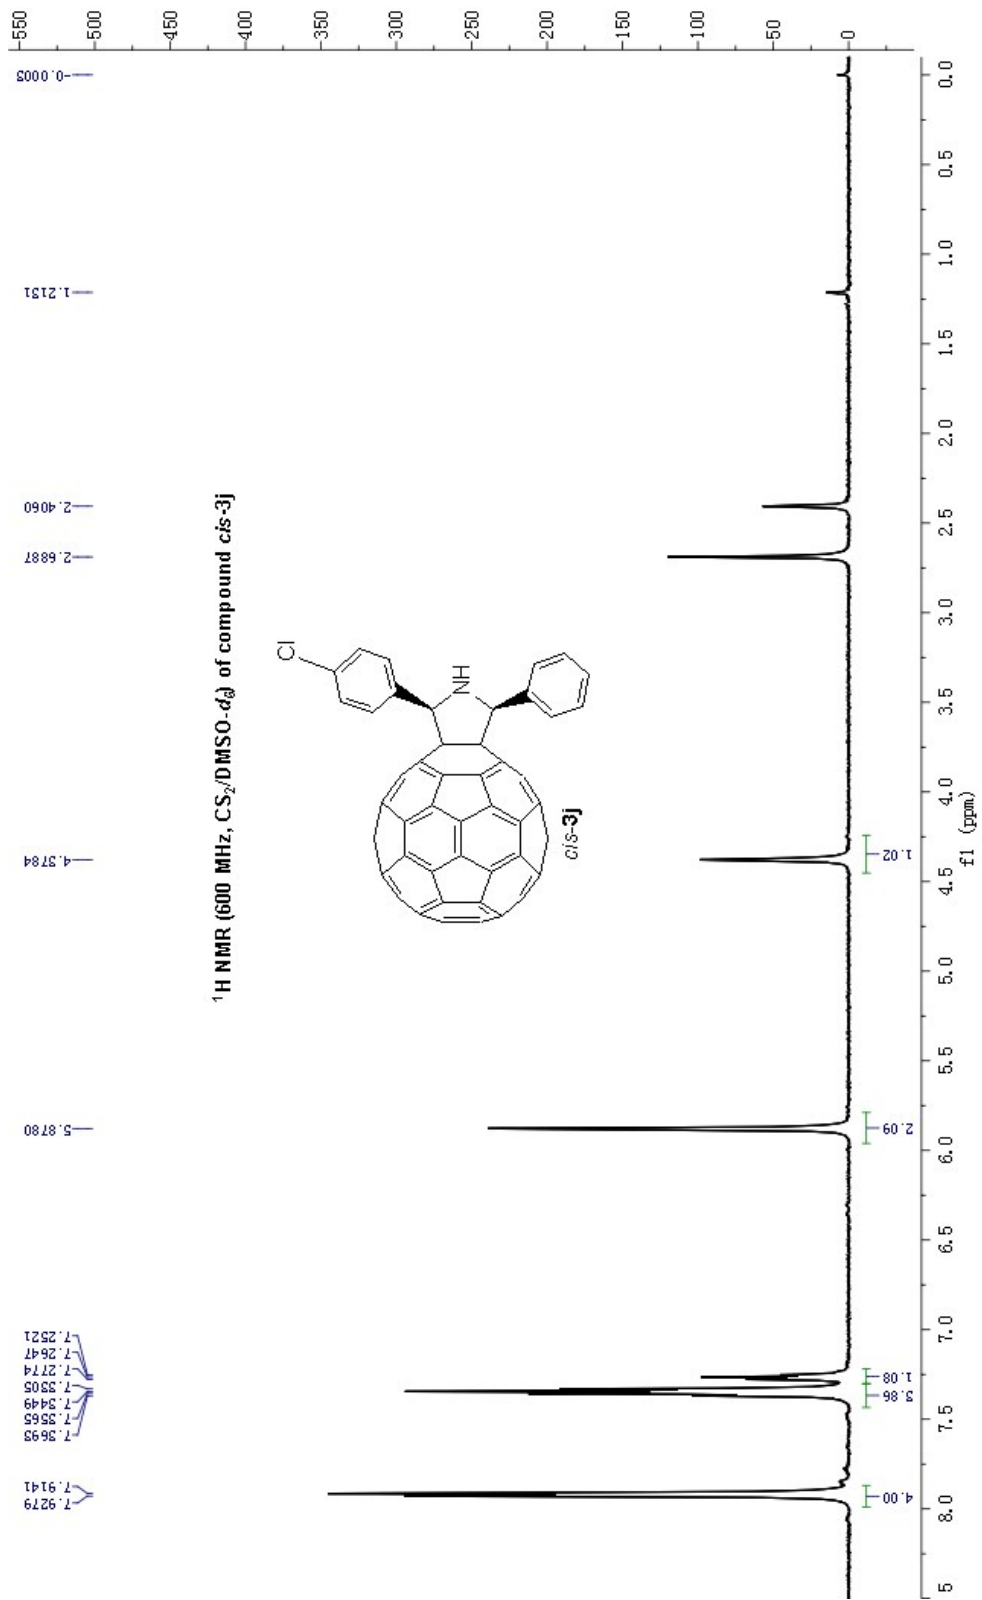

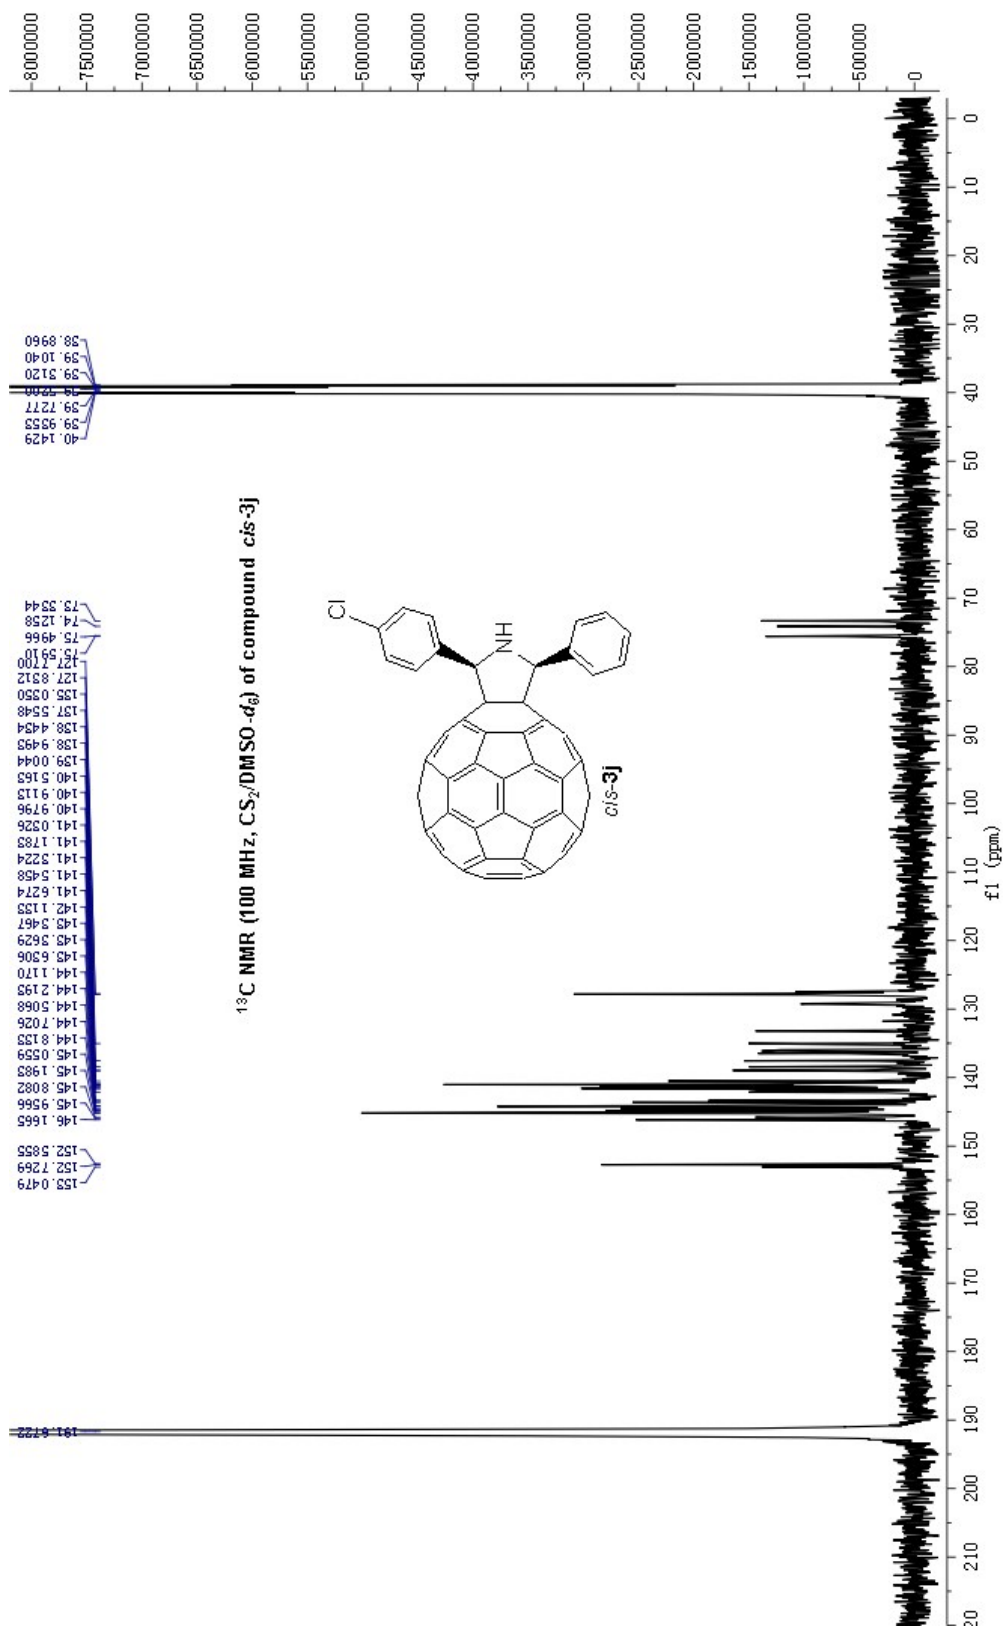

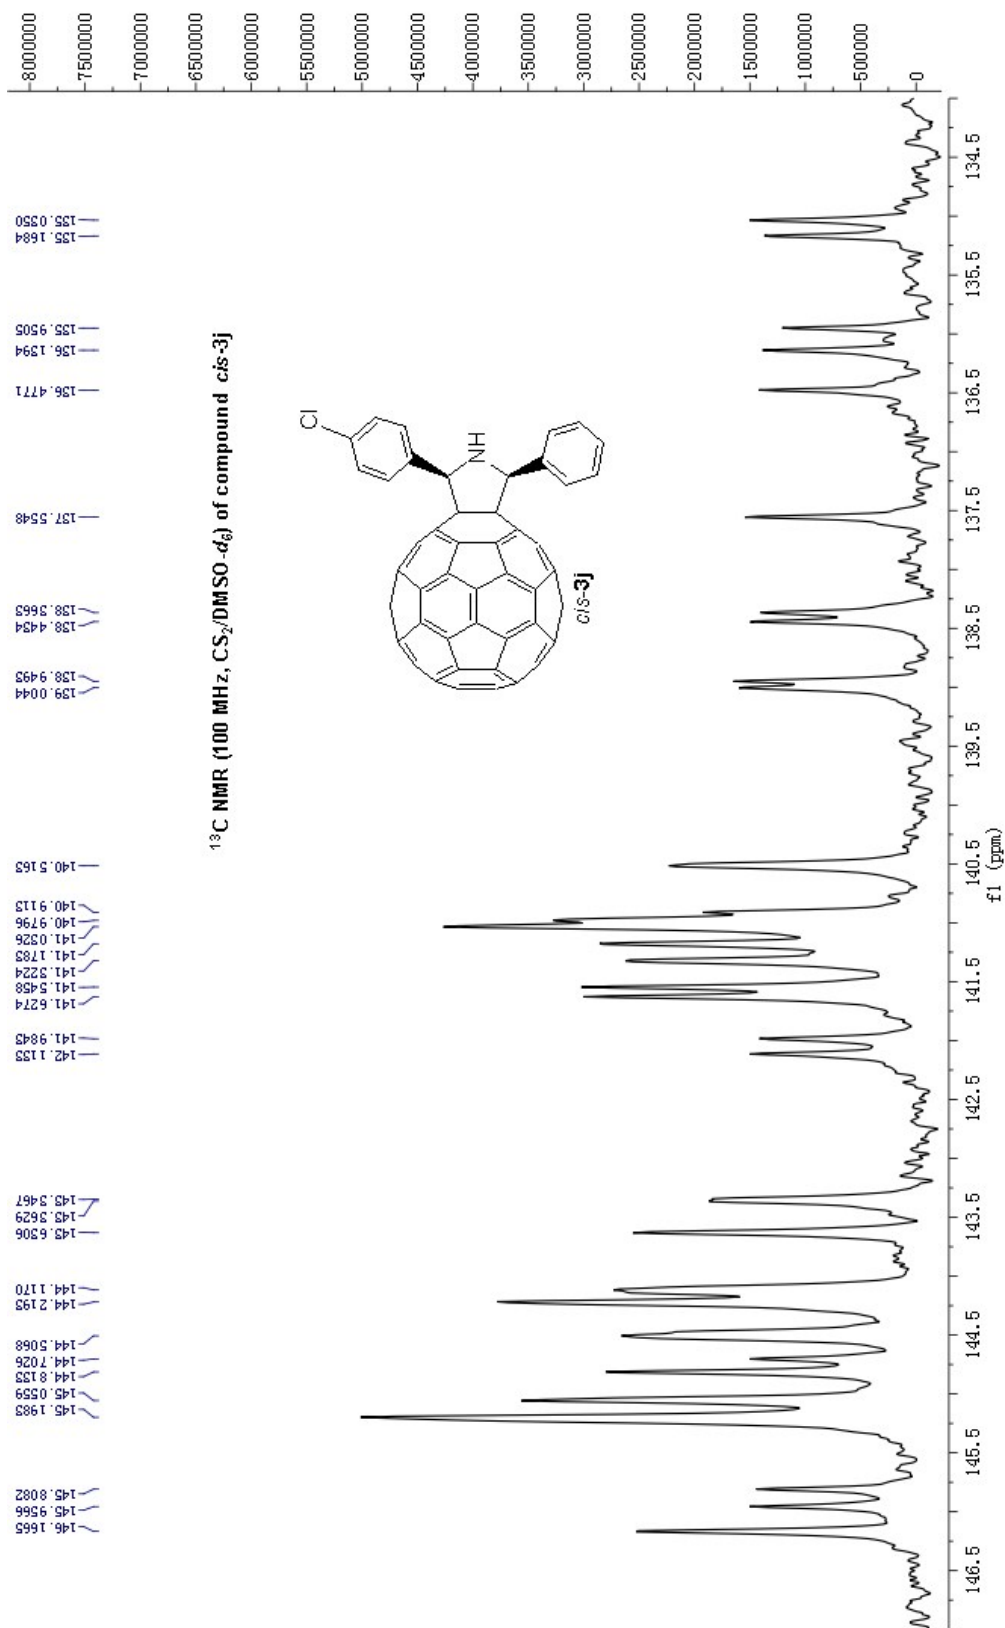

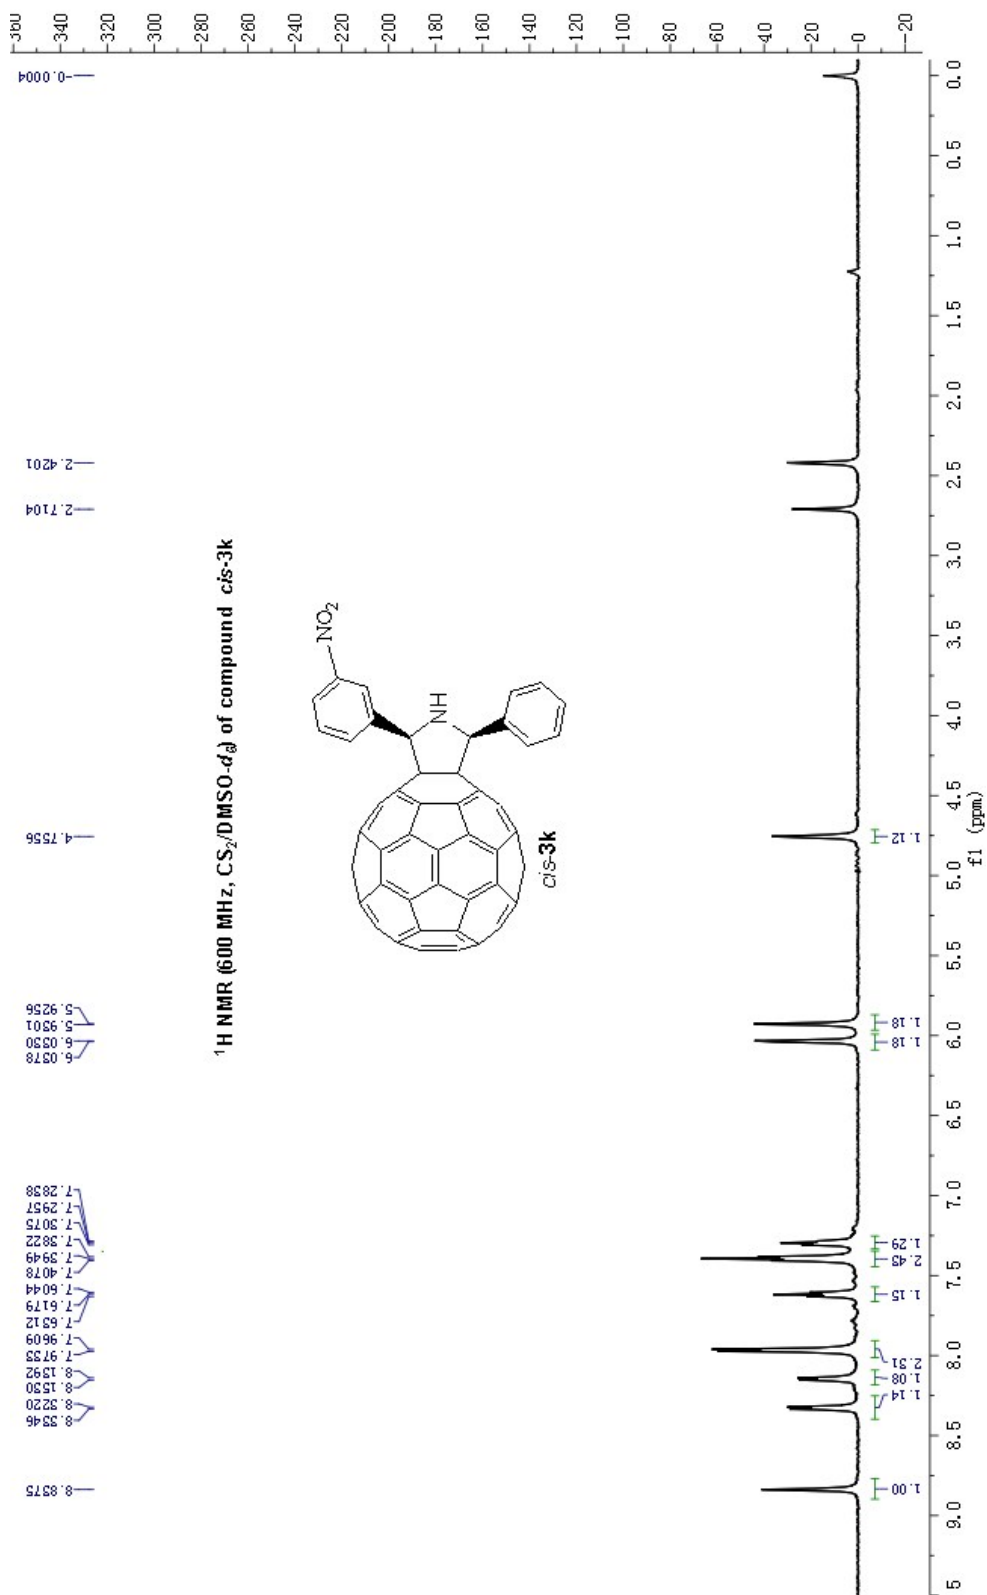

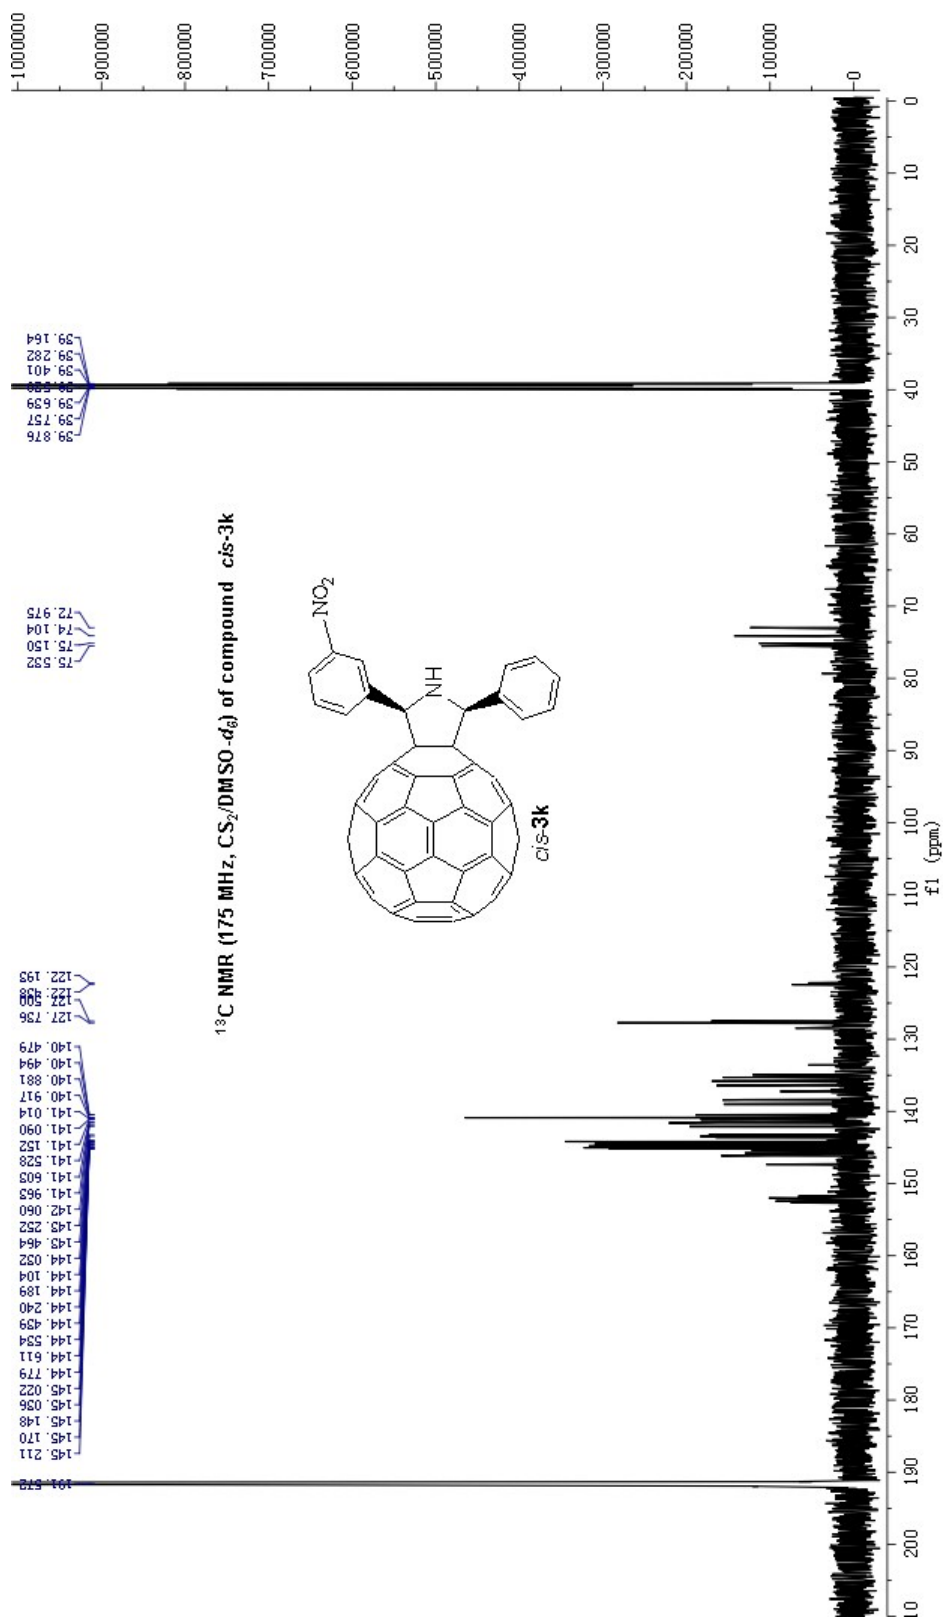

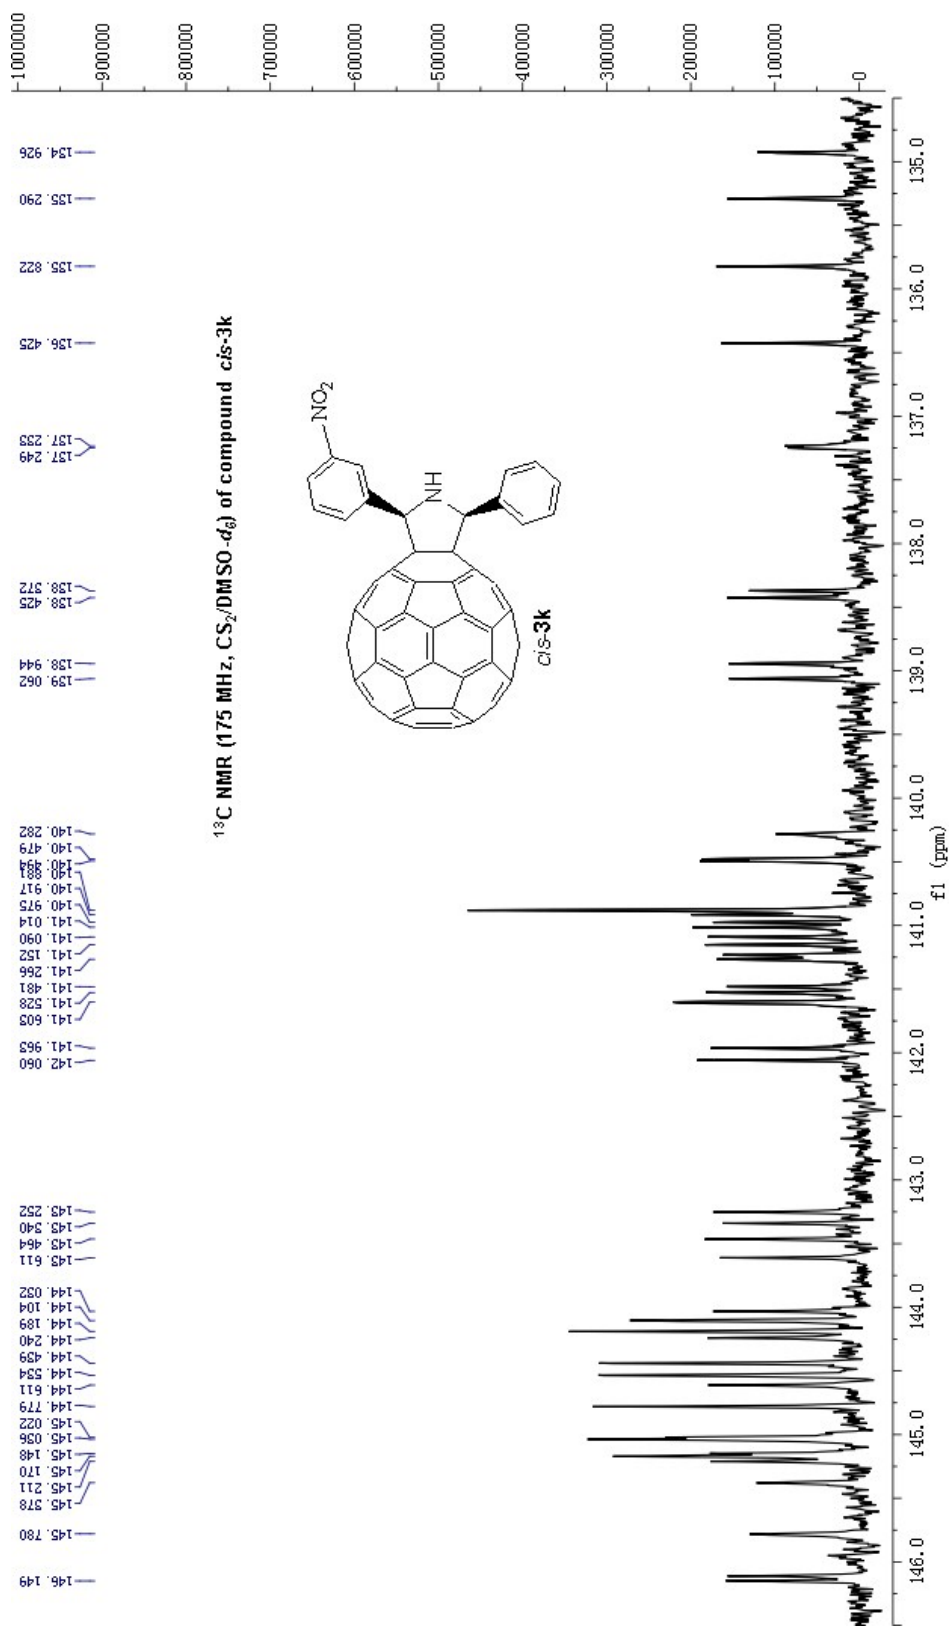



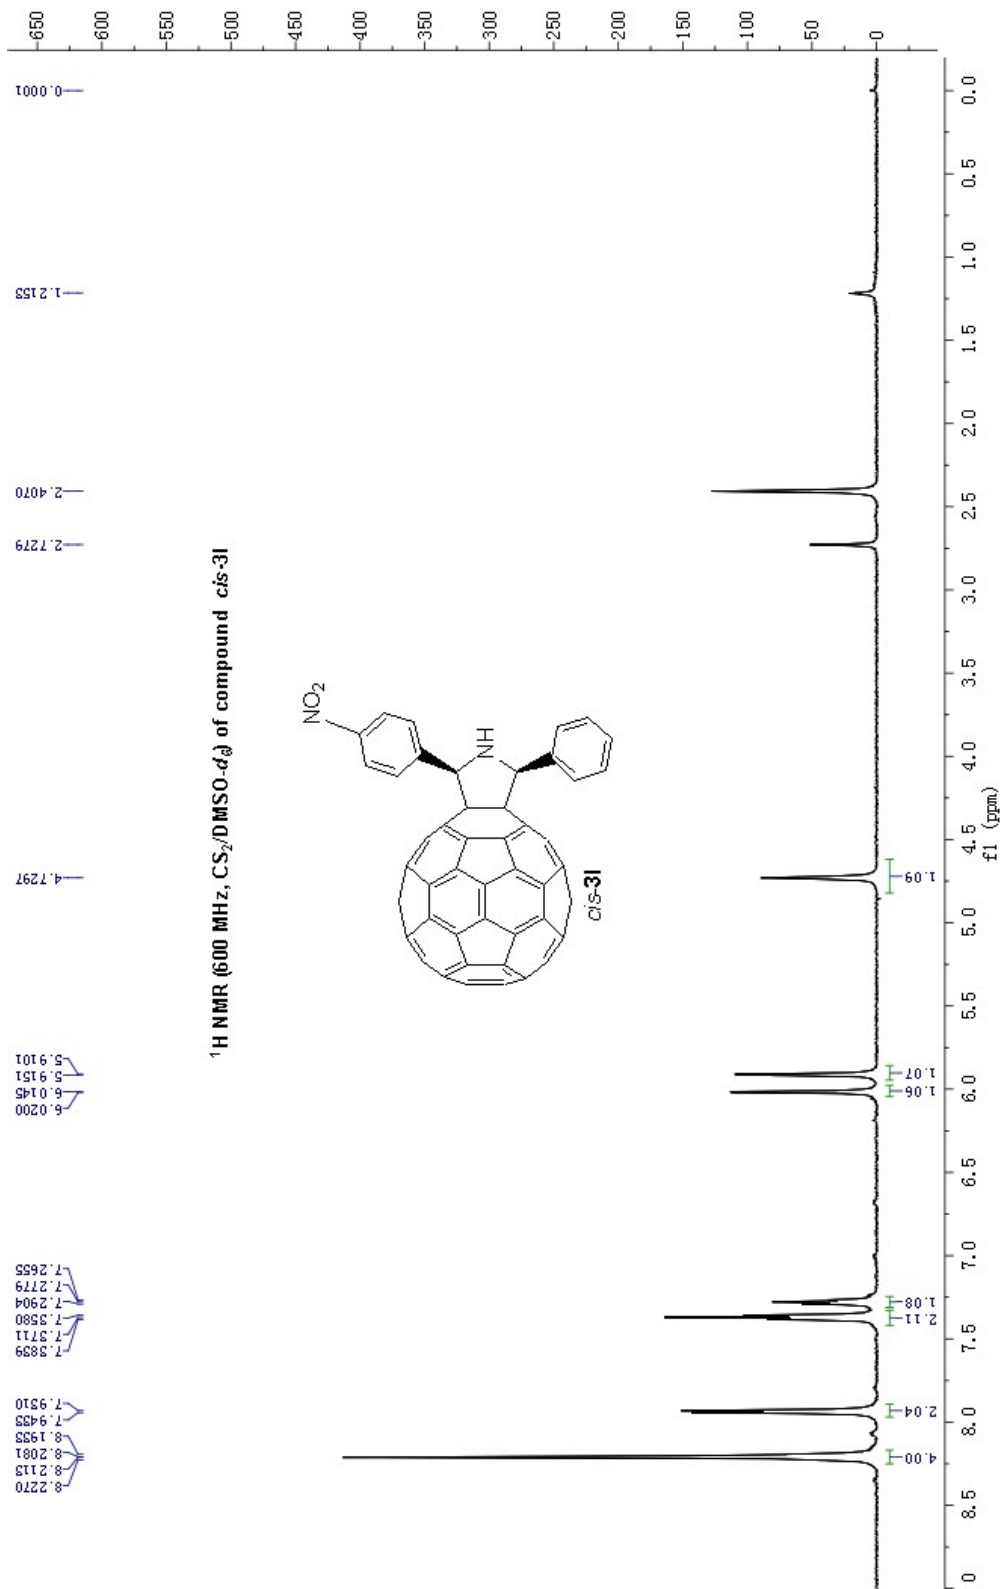

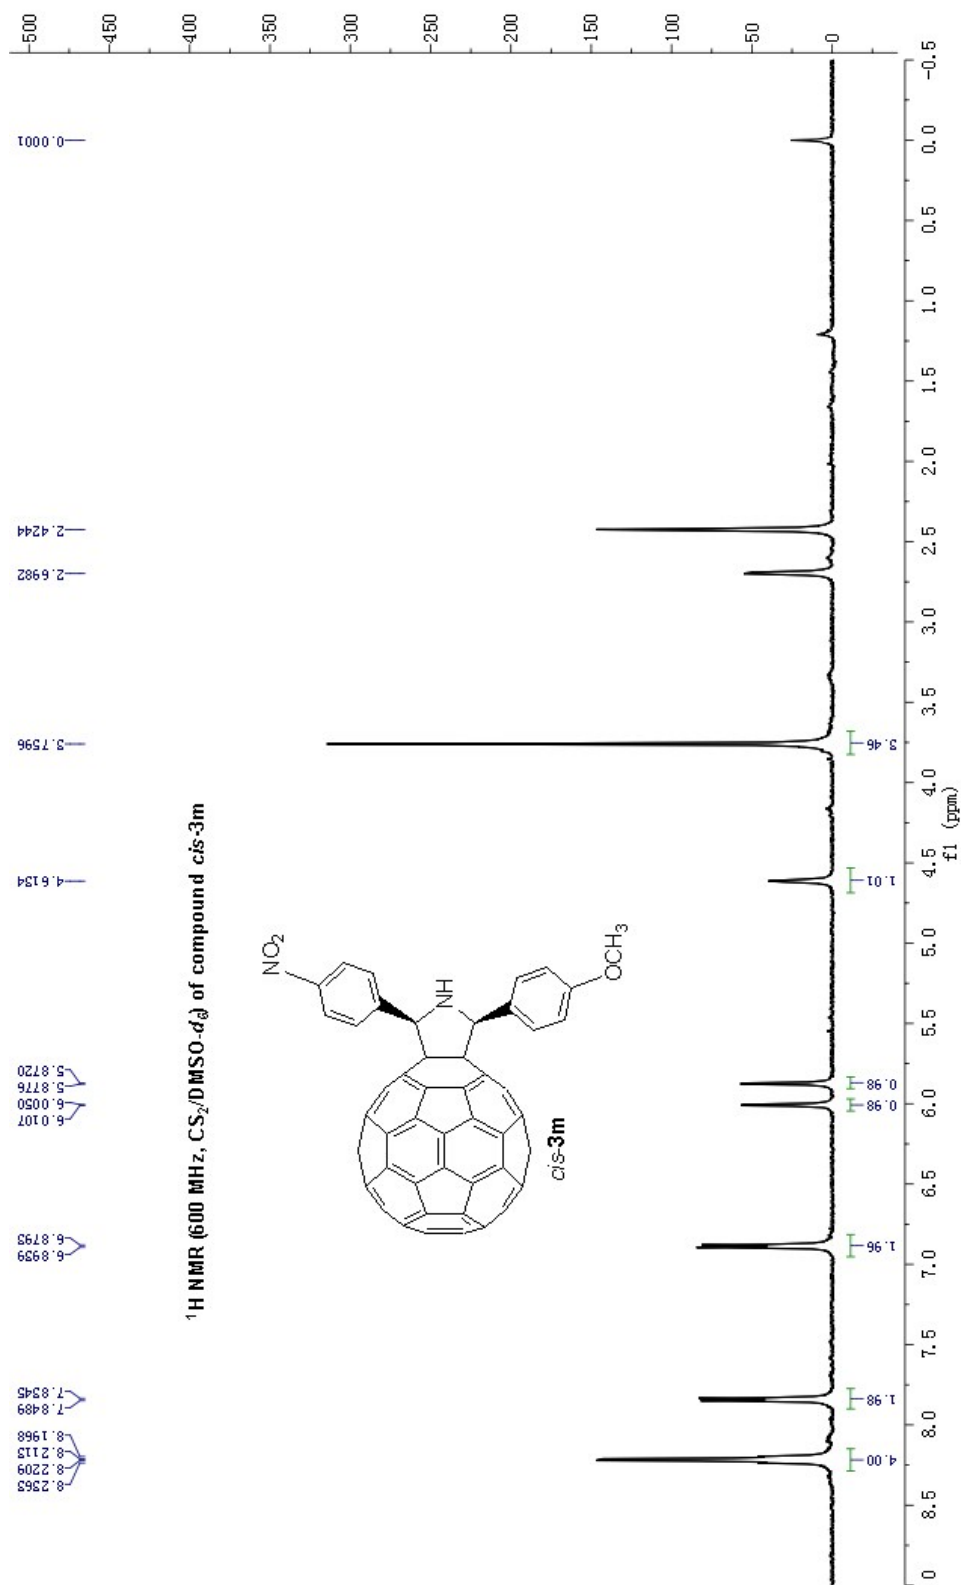

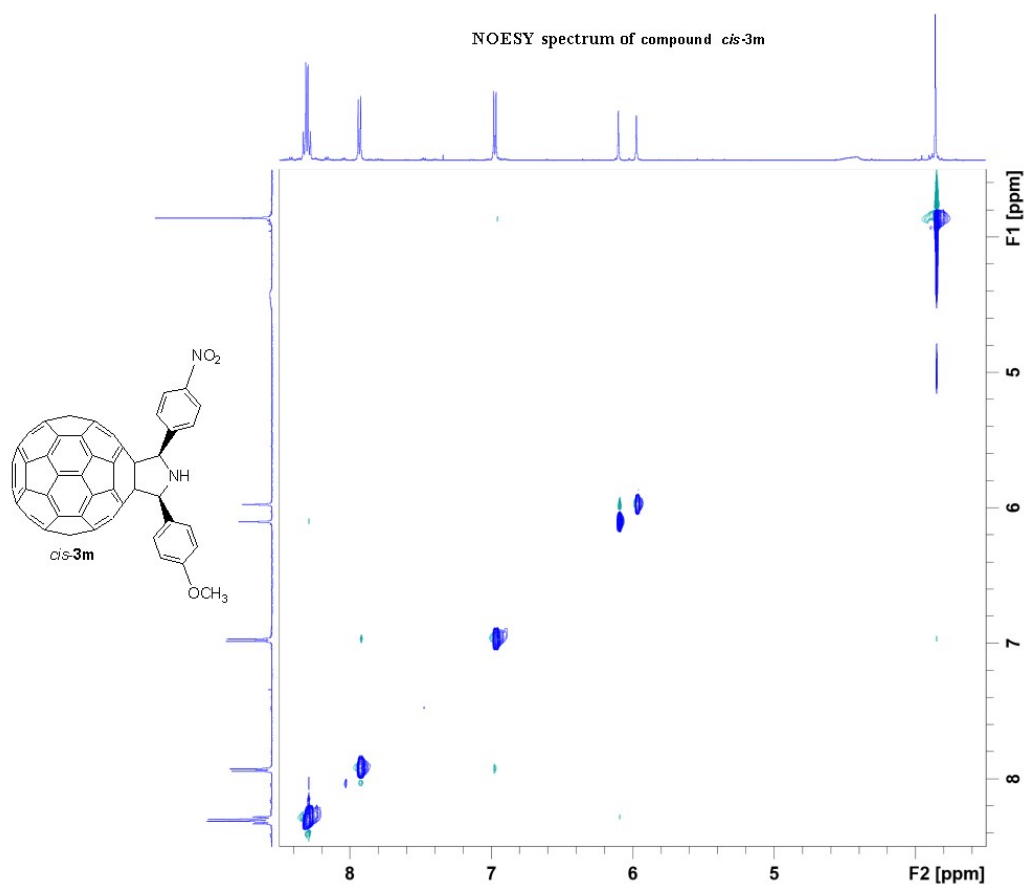

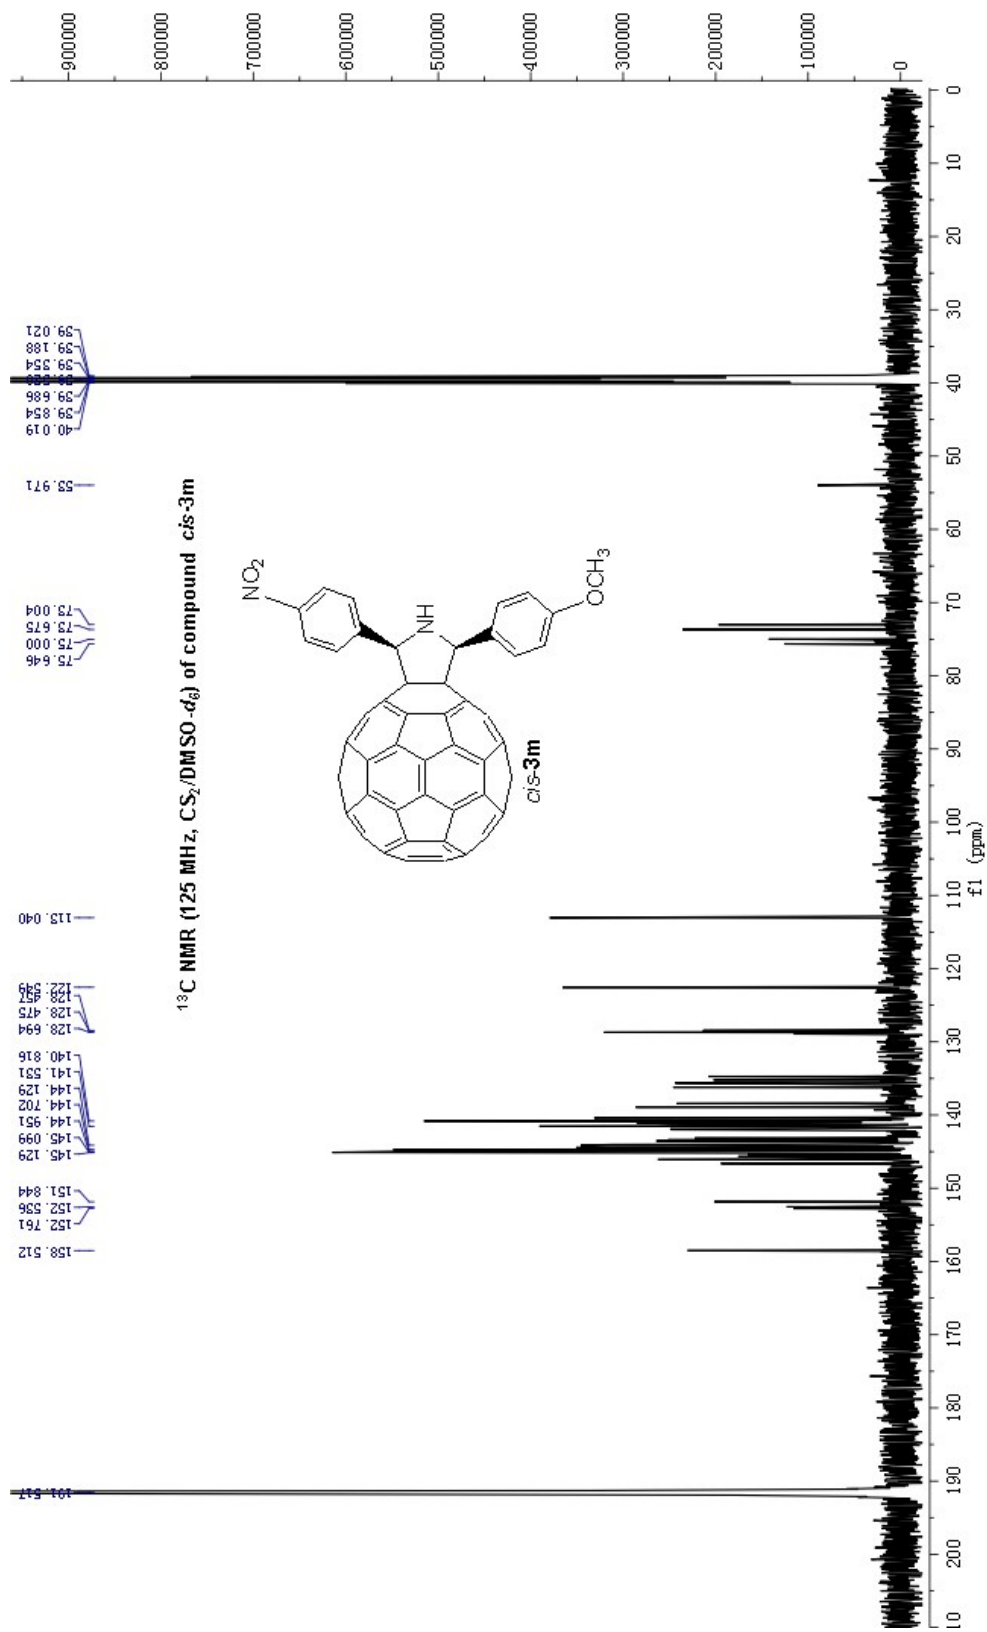

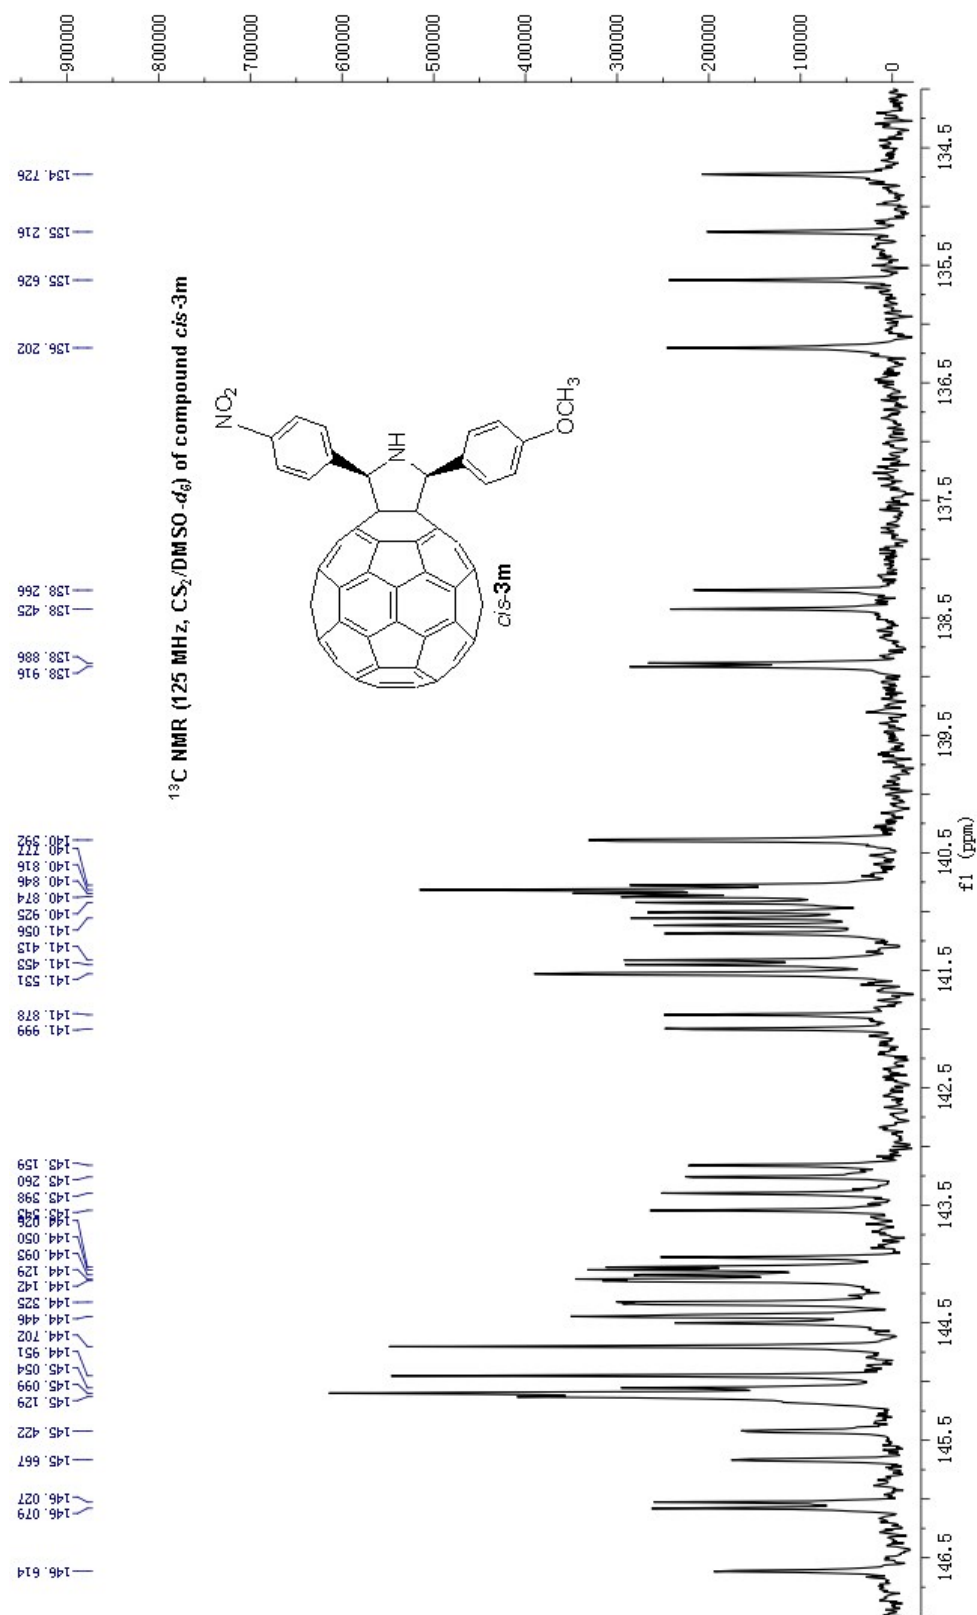

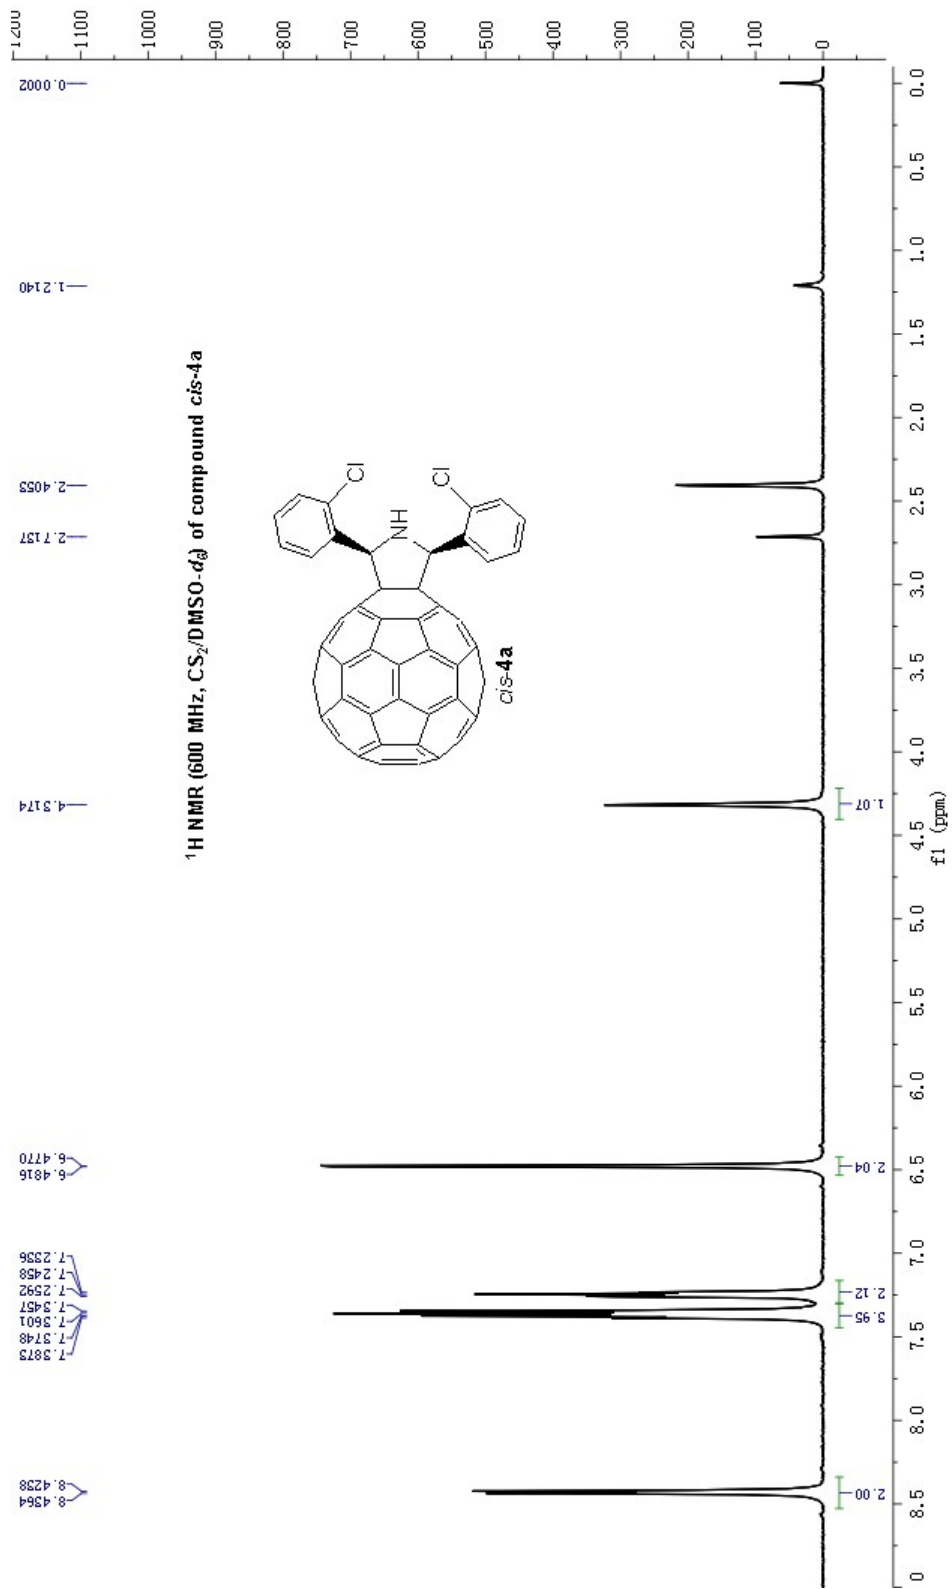

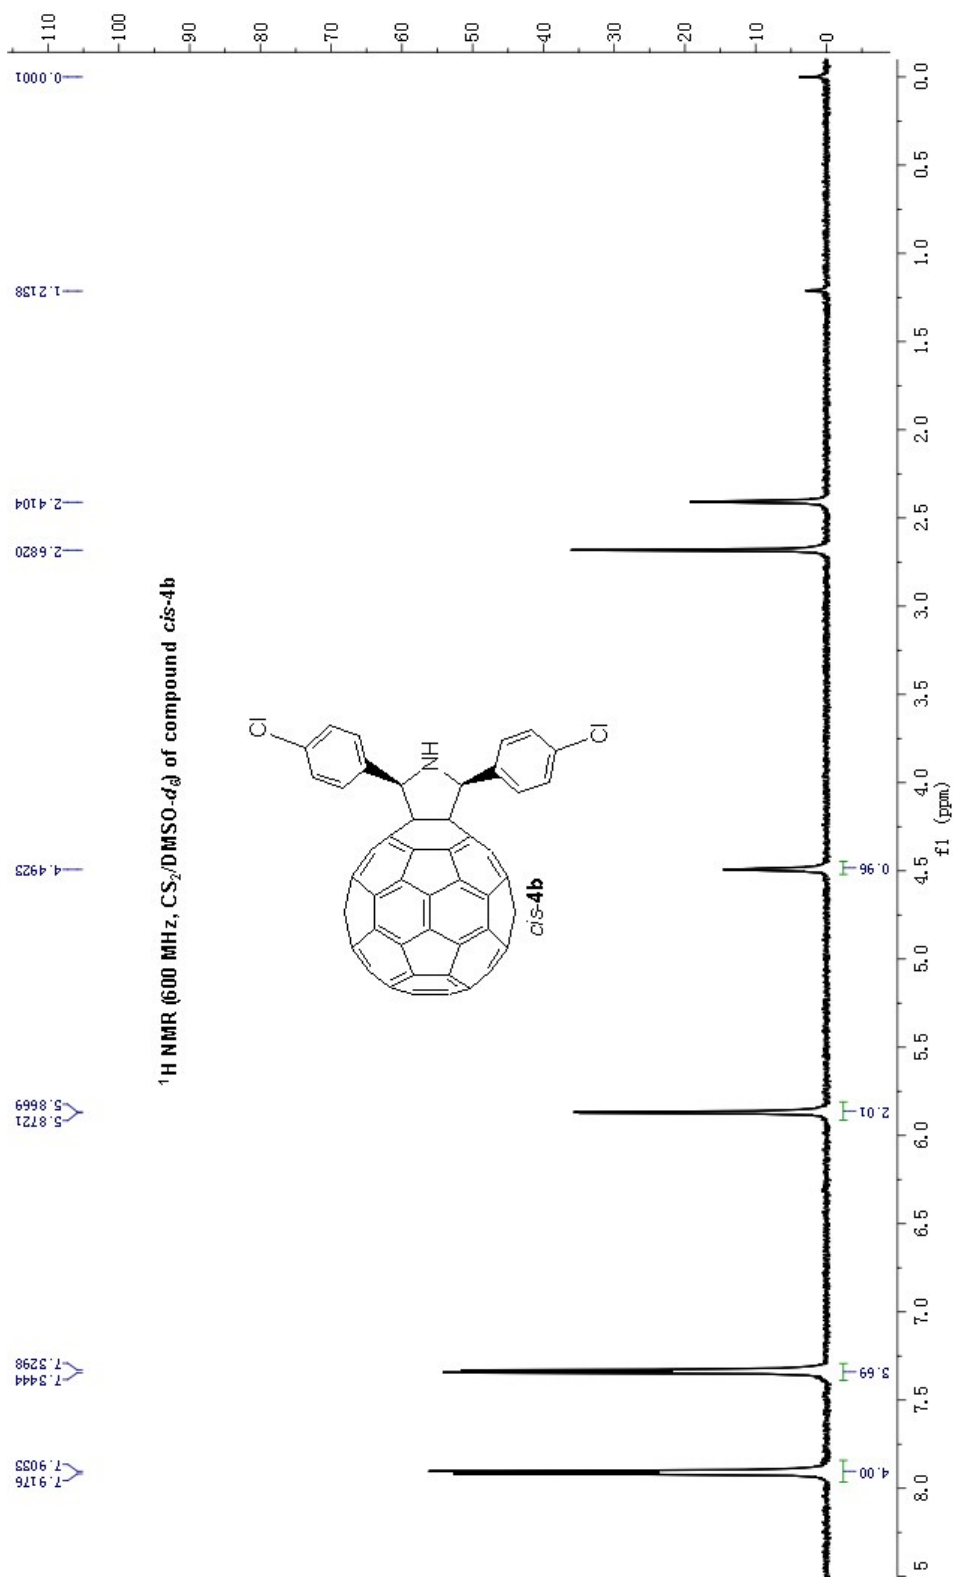

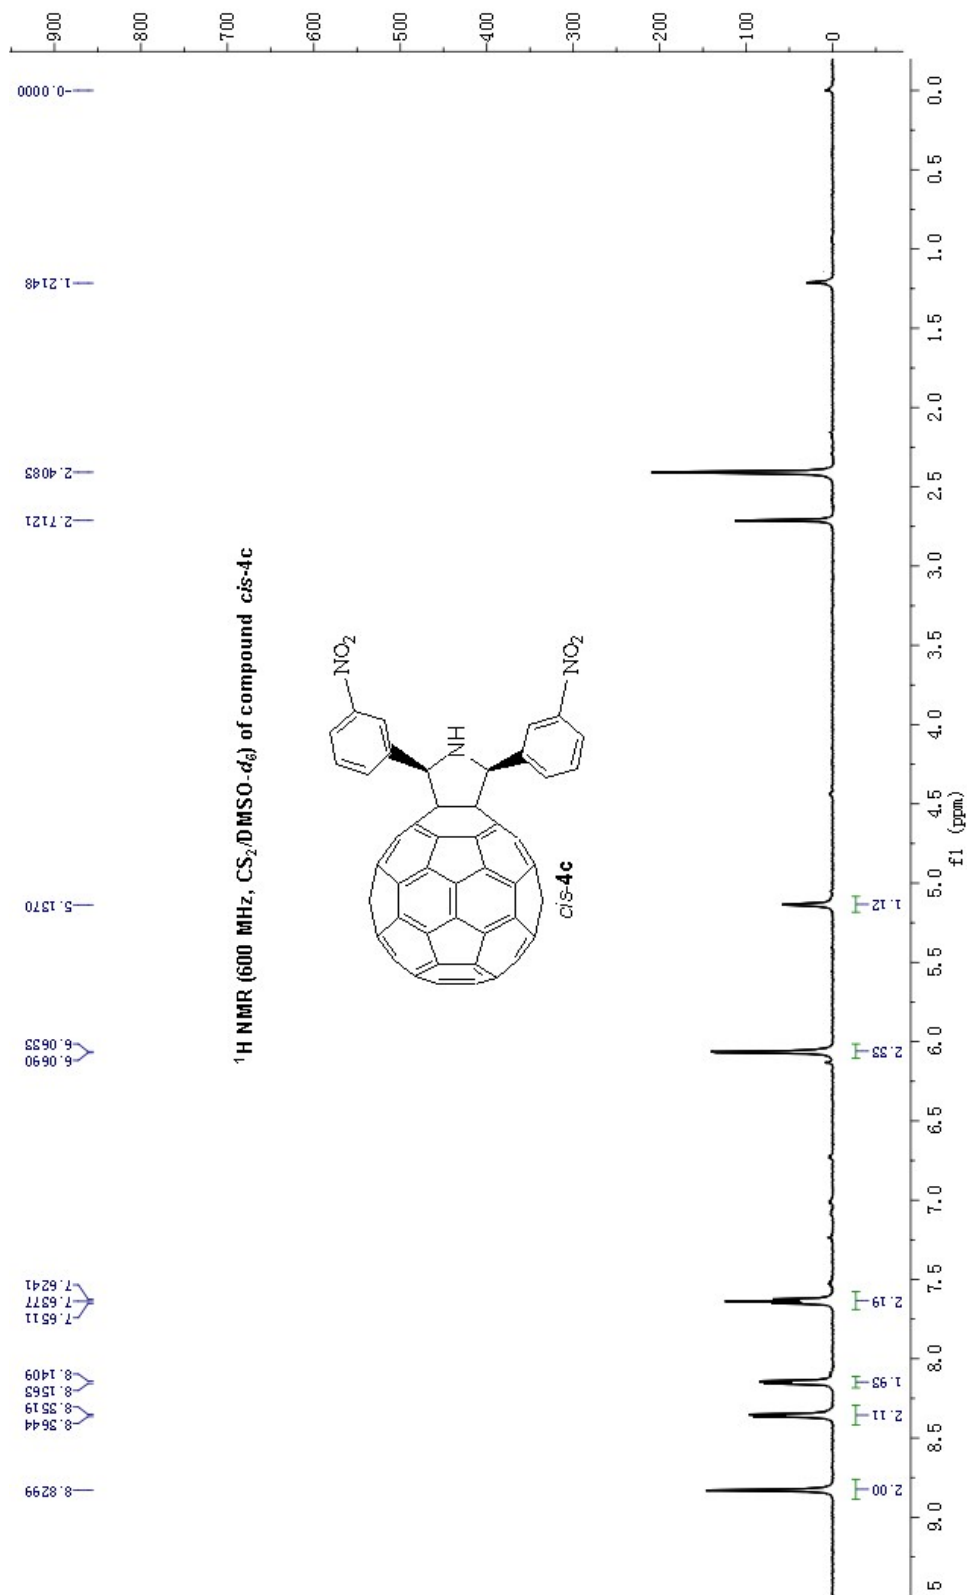



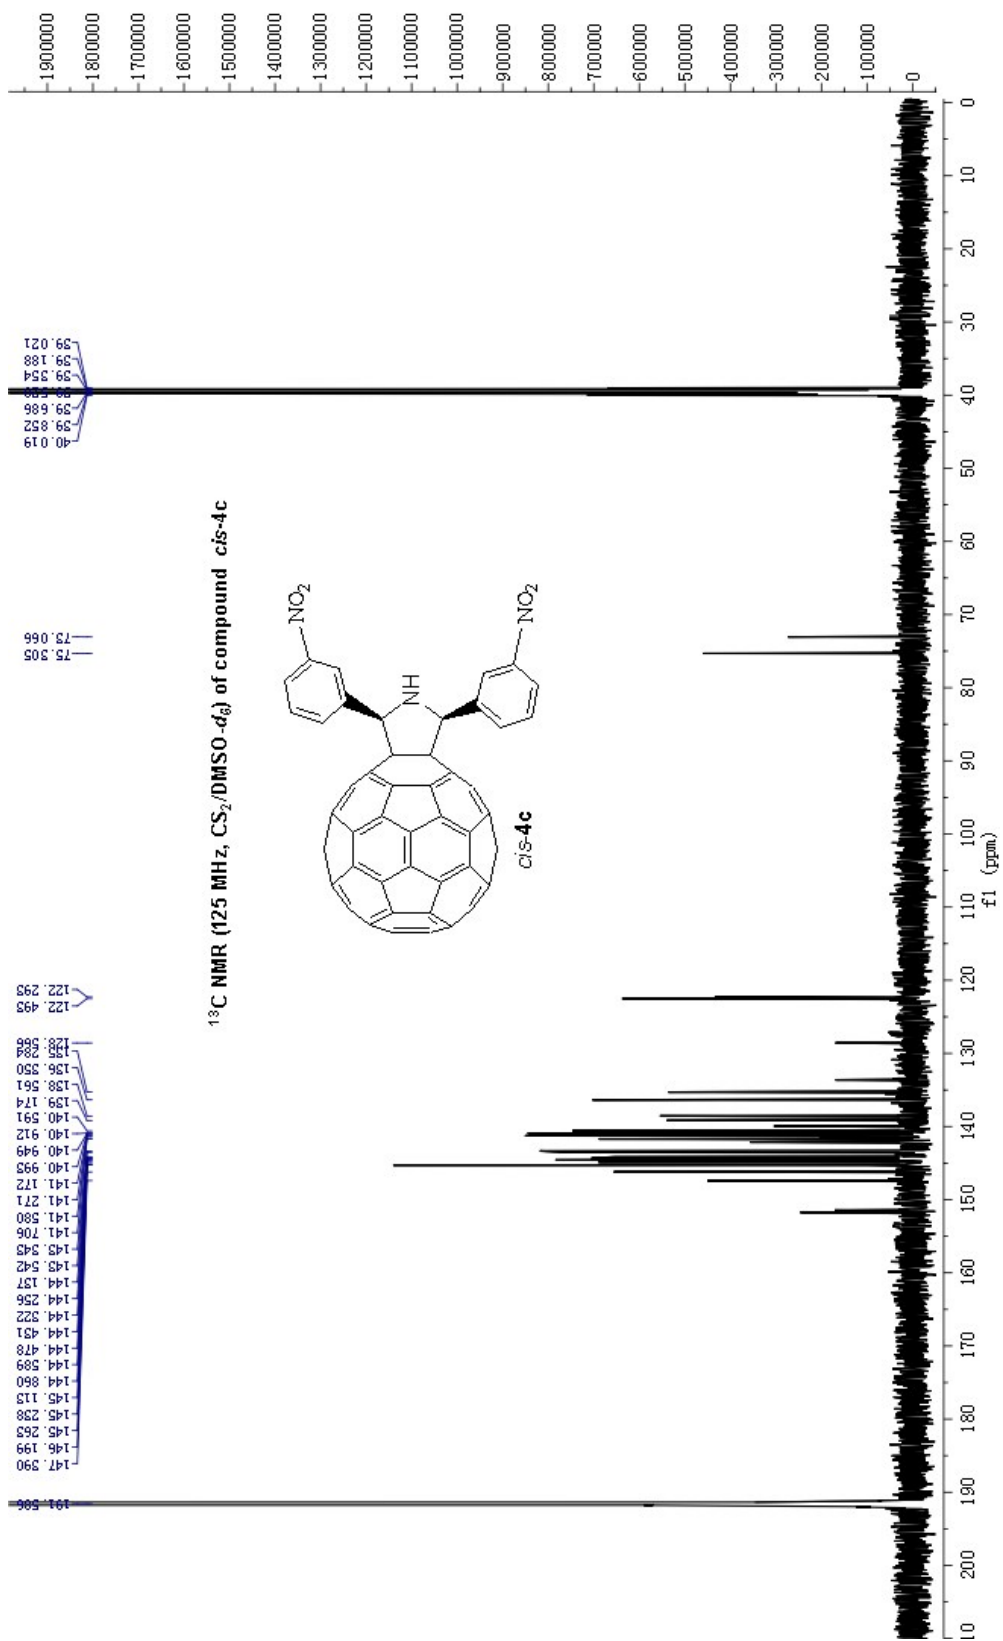

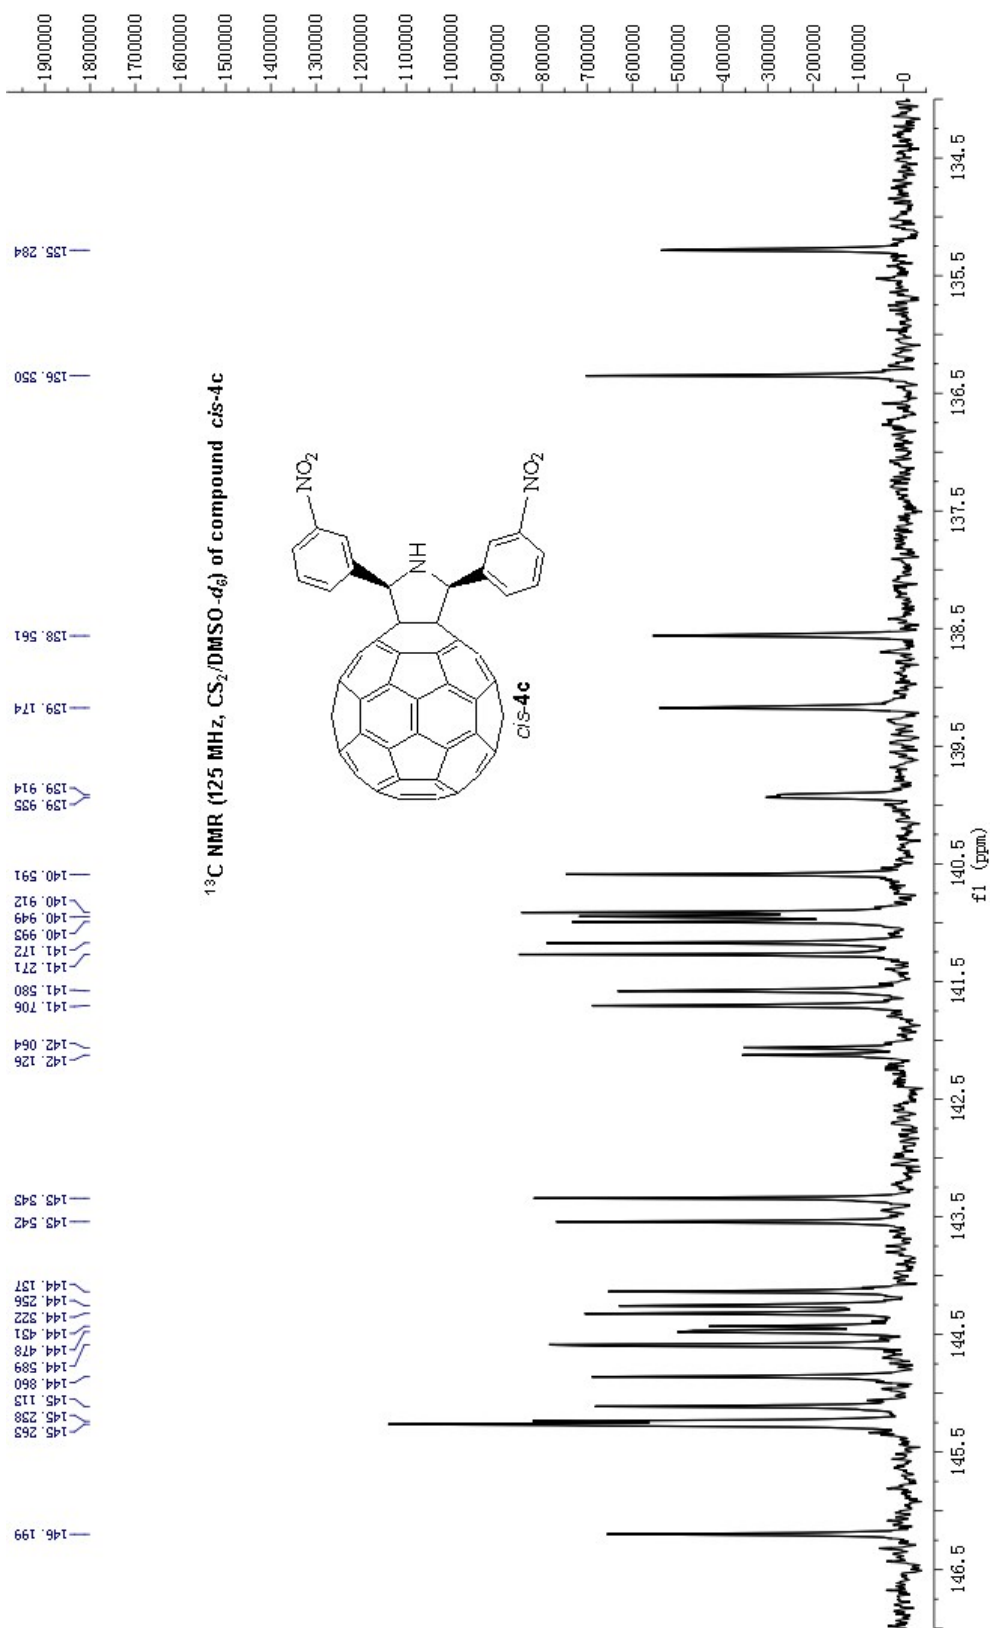

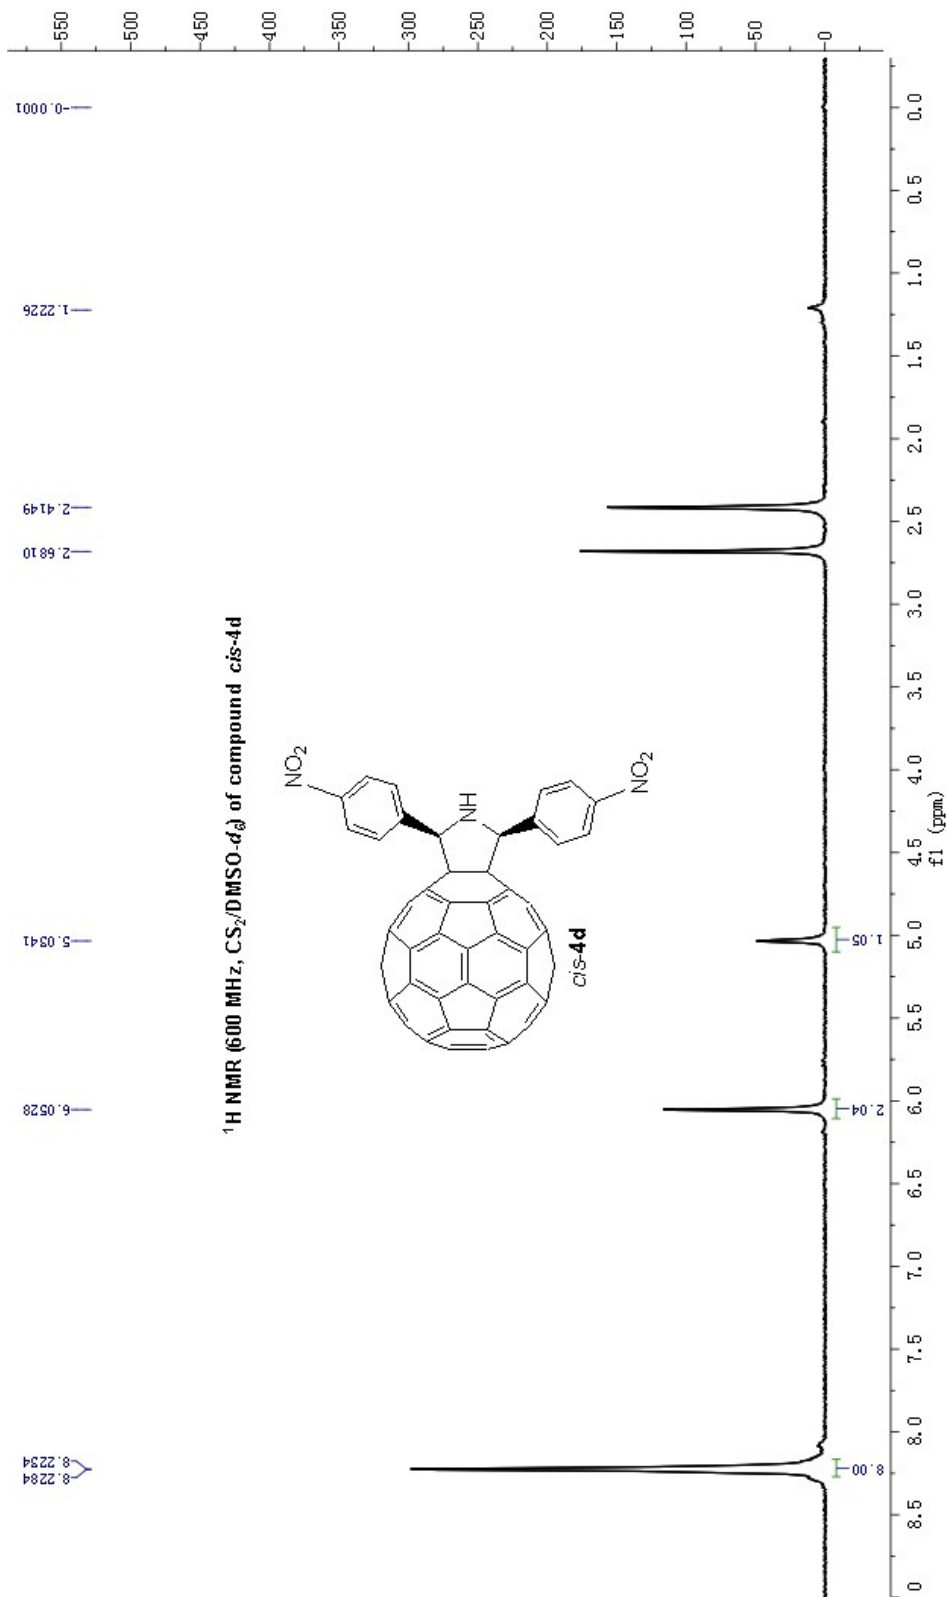

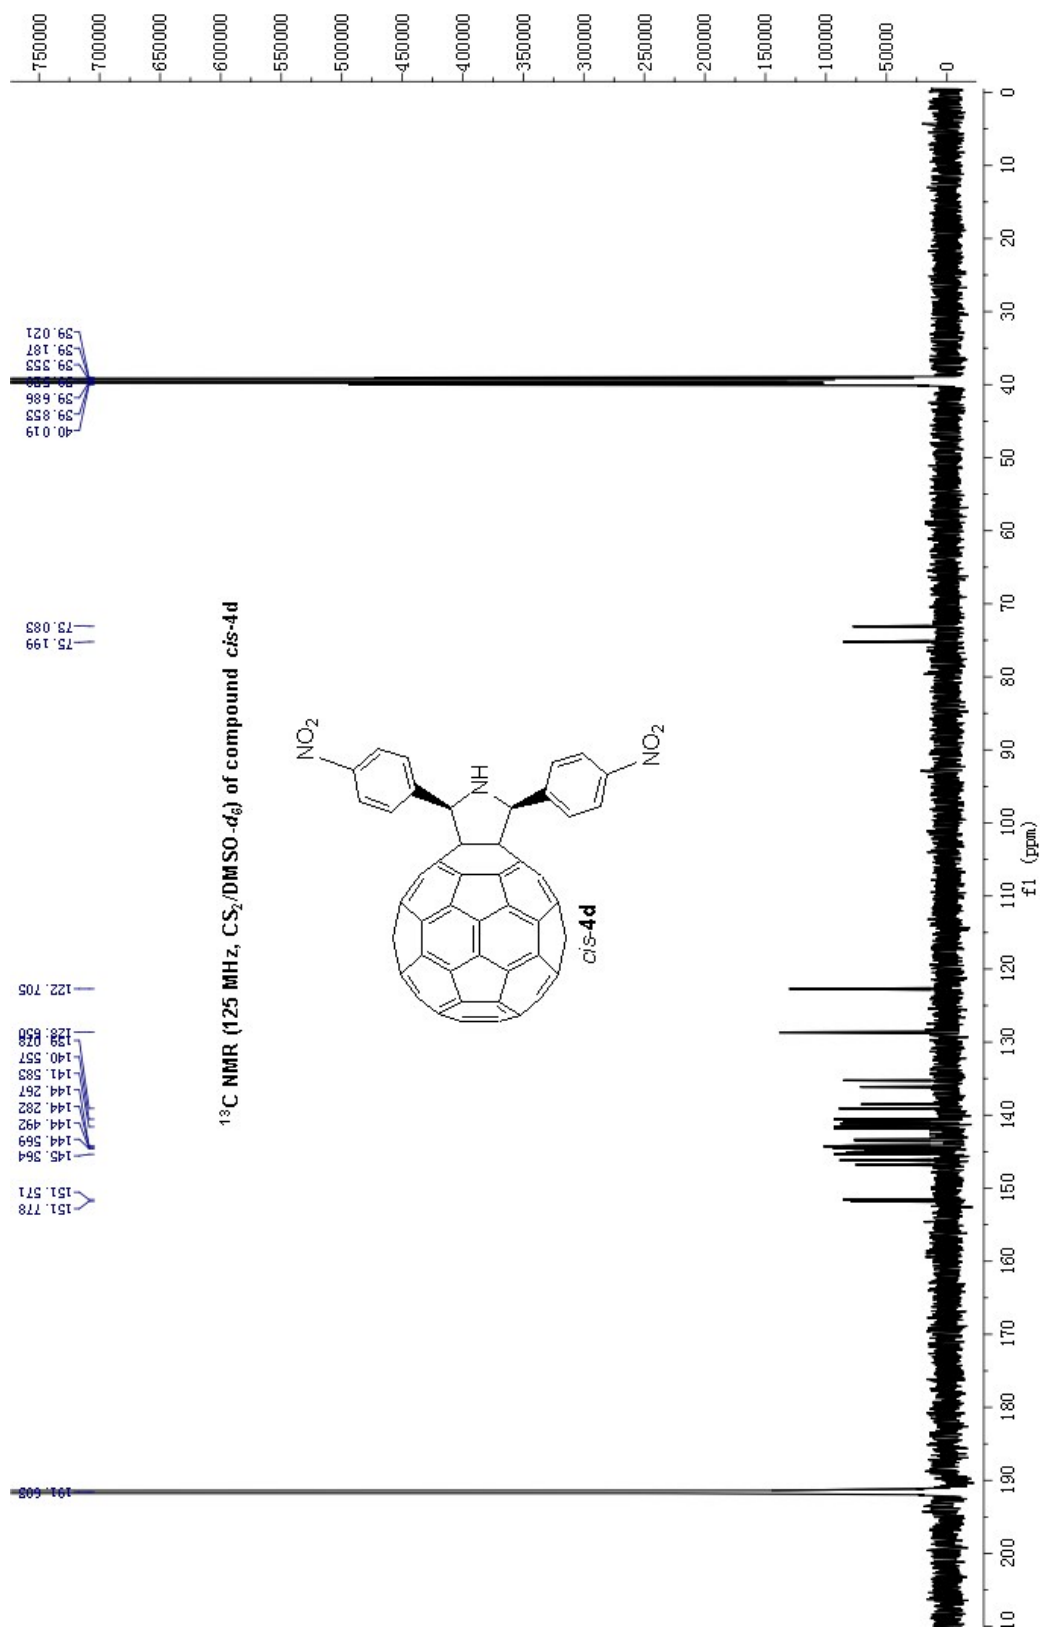

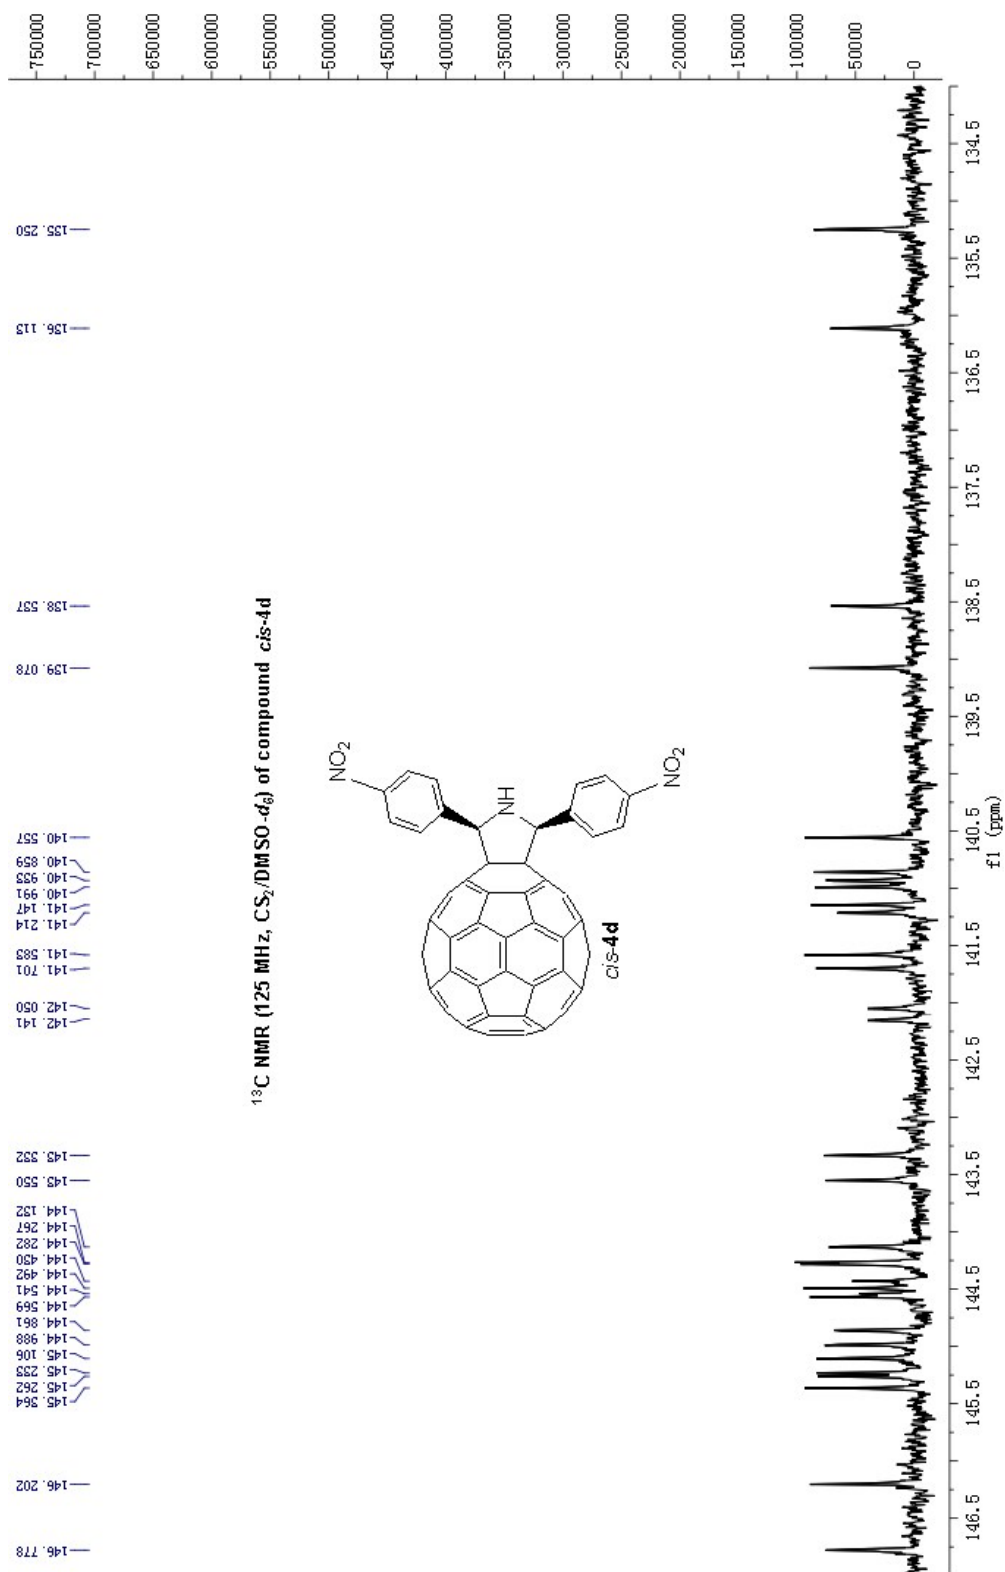

Supplement: c6ra16041g1.pdf [file c6ra16041g1.pdf]
